# Supplementary material
Source: PubMed Central journal article supplement (PMC6027600)

# Enantioselective, Ketoreductase-Based Entry into Pharmaceutical Building Blocks: Ethanol as Tunable Nicotinamide Reductant

Sylvain Broussy, Ross W. Cheloha and David B. Berkowitz\*

*Department of Chemistry, University of Nebraska, Lincoln, NE 68588-0304*

*dbb@unlserve.unl.edu*

## SUPPORTING INFORMATION

### Table of Contents

|             |                                                                                 |                |
|-------------|---------------------------------------------------------------------------------|----------------|
| <b>I.</b>   | <b>General Experimental.....</b>                                                | <b>S2</b>      |
| <b>II.</b>  | <b>Synthetic Chemistry.....</b>                                                 | <b>S2</b>      |
| <b>III.</b> | <b>Thermodynamics/Economics of Nicotinamide Cofactor Reductants.....</b>        | <b>S6</b>      |
| <b>IV.</b>  | <b>NMR Model Study – Effect of YAI DH (four electron redox conditions).....</b> | <b>S8</b>      |
| <b>V.</b>   | <b>HPLC Traces.....</b>                                                         | <b>S9-S17</b>  |
| <b>VI.</b>  | <b>Copies of <sup>1</sup>H and <sup>13</sup>C NMR Spectra.....</b>              | <b>S18-S36</b> |

## I. General Experimental

THF and ether were distilled from sodium benzophenone ketyl. Methanol was distilled over magnesium and iodine. Dichloromethane and diisopropylamine were distilled over CaH<sub>2</sub>. Other reagents were obtained from commercial sources and used without further purification. Reaction progress was monitored by TLC or GC-MS (HP model 5890 GC with model 5972 MS). Flash chromatography was performed using Merck silica gel 60 (230-400 mesh). <sup>1</sup>H NMR spectra were recorded on Bruker-DRX-Avance-300, 400 or 500 MHz instruments, with chemical shifts reported relative to residual CHCl<sub>3</sub> (7.25 ppm). Proton-decoupled <sup>13</sup>C NMR spectra were acquired on Bruker-DRX-Avance-300, 400 or 500 MHz instruments, with chemical shifts reported relative to CDCl<sub>3</sub> (77.0 ppm). High resolution mass spectra were acquired at the Nebraska Center for Mass Spectrometry (University of Nebraska). Chiral HPLC analysis was performed either on a Chiralcel OD column or an (*S,S*)-WHELK O-1 Pirkle column, as specified in the procedures. Elution was carried out with isopropanol/hexane, at the percentages and flow rates given. Yeast aldehyde dehydrogenase (YALDH) was purchased from Roche, Yeast alcohol dehydrogenase (YADH) and *Lactobacillum kefir* alcohol dehydrogenase (LKADH) were purchased from Sigma. KRED (ketoreductase) enzymes were purchased from Codexis, CPADH and RS1ADH were generously provided by Jülich Chiral Solutions and, unless otherwise specified, S. I. units for all ADH enzymes are defined by the following standard UV assay: the reduction of acetophenone (10 mM) with NAD(P)H (0.2 mM) in 50 mM potassium phosphate buffer, pH 7.0, containing 5% (v/v) DMF, at 22°C.

## II. Synthetic Chemistry

### Procedure A: Typical Conditions for Ketone Screening

A solution or suspension of ketone building block (1-5 μmol, 1-5 mM), NAD(P)H cofactor (1-1.1 eq., 1-5.5 μmol, unless otherwise specified), and ADH enzyme (as indicated) in 50 mM KPO<sub>4</sub> buffer pH 6.0 (1 mL final volume) was shaken at 350 rpm at 30°C. Reaction progress was monitored by TLC. Successful combinations of ketone and dehydrogenase were often run for 24 h to provide a point of comparison. The crude reaction mixture was then extracted with ethyl acetate, and the combined extracts dried over Na<sub>2</sub>SO<sub>4</sub>. Following vacuum filtration and solvent evaporation, in vacuo, the reaction progress was examined by NMR. Conversion was estimated by integration of the characteristic signals of alcohol product and residual starting ketone in the crude <sup>1</sup>H NMR spectrum.

### Procedure B: Preparation of HPLC Standards (Ketone Reduction with NaBH<sub>4</sub>)

To a solution of ketone building block (1 mmol) in MeOH (10 mL) at 0°C was added NaBH<sub>4</sub> (1 mmol, 37 mg). After completion of the reaction (monitored by TLC), the reaction mixture was quenched by addition of NH<sub>4</sub>Cl (aq, sat'd) and extracted with ether. The combined organic layers were dried over Na<sub>2</sub>SO<sub>4</sub>, filtered and evaporated, in vacuo. Where needed, samples were further purified chromatographically to provide racemic, secondary alcohols as HPLC standards, for the targeted, value-added products.

### Procedure C: Typical Conditions for Ketone Reductions with EtOH-Based NADH Cofactor Recycling

A solution or suspension of ketone building block (1-5  $\mu\text{mol}$ , 1-5 mM),  $\text{NAD}^+$  cofactor (0.001-0.01 eq., 1-50 nmol, 1-50  $\mu\text{M}$ ), CPADH stock solution (20-50  $\mu\text{L}$ , 0.13-0.33 acetophenone units), EtOH (5 vol%) and YALDH (0.5 mg solid) in 50 mM  $\text{KPO}_4$  buffer pH 7.5 (1 mL final volume) was shaken at 350 rpm for 1 day at 30°C. The reaction mixture was then extracted with ethyl acetate, dried over  $\text{Na}_2\text{SO}_4$ , and the solvent was evaporated. Conversion was determined by integration of peaks characteristic of product alcohol and residual ketone in the  $^1\text{H}$  NMR spectrum.

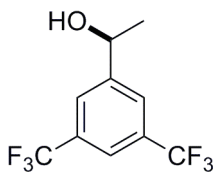

#### (S)-1-[3,5-Bis(trifluoromethyl)phenyl]ethanol (2).

From commercially available 1-[3,5-bis(trifluoromethyl)phenyl]ethanone following procedure A with CPADH (0.33 acetophenone U), the title compound was obtained with complete conversion and 98% ee for the *S* enantiomer,<sup>1</sup> determined by  $^1\text{H}$  NMR spectrum analysis after synthesis of the Mosher ester derivative or chiral HPLC with a Chiralcel OD column, 98% hexane/2% isopropanol, 1 ml/min at 265 nm. NMR spectral data matched those reported earlier.<sup>1</sup>

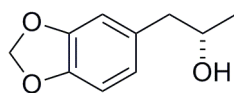

#### (S)- $\alpha$ -Methyl-1,3 benzodioxole-5-ethanol (4).

From 3,4-methylenedioxyphenyl acetone<sup>2</sup> **3** (1 mM), following procedure C (0.002 eq.  $\text{NAD}^+$  and 0.33 CPADH acetophenone units), was obtained the title compound in 99% ee (*S* enantiomer) @ 75% conversion (375 cofactor regeneration cycles). Absolute stereochemistry and ee were determined by chiral HPLC (Pirkle (*S,S*)-WHELK O-1 column, 1 mL/min flow rate, isopropanol/hexane 1:99, or Chiralcel OD, isopropanol/hexane 1:99,  $\lambda = 265$  nm). The assignment of the absolute stereochemistry was made by comparison of the relative retention times to those described by the Eli Lilly Process Chemistry Group.<sup>3</sup> NMR spectral data matched those reported in the literature.<sup>4</sup>

On a larger scale, a solution of 3,4-methylenedioxyphenyl acetone (178 mg, 1 mmol),  $\text{NAD}^+$  (2.7 mg, 4  $\mu\text{mol}$ , 0.4 mol %), CPADH (26 acetone U), YADH (4 mg, 1.8 KU), YALDH (4 mg, 4.4 U, + 4.4 mg after 10h) and BSA (200 mg) in 36 mL  $\text{KPO}_4$  buffer pH 7.5 (50 mM) and EtOH (4 mL) was shaken at 350 rpm and 30°C for 20h. The reaction mixture was extracted with  $\text{Et}_2\text{O}$ , the organic phases dried over  $\text{Na}_2\text{SO}_4$ , evaporated and the residue purified by column chromatography on silica gel to give 161 mg (89% yield) of the title compound in 94% ee.  $[\alpha]_{365} = +120.3^\circ$  (c 1.1,  $\text{CHCl}_3$ ) for 94% ee,  $\{\text{lit}^4: [\alpha]_{\text{D}} = +117.2^\circ$  (c 1.0,  $\text{CHCl}_3$ ) for 99% ee}.

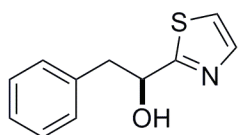

**(S)-2-Phenyl-1-(thiazol-2-yl)ethanol (6).**

From 2-phenyl-1-(thiazol-2-yl)ethanone **5**, following procedure A, with KRED 132 (0.19 acetophenone U), the title compound was obtained in 98% ee *S* enantiomer (@83% conversion), as determined by chiral HPLC (Chiralcel OD column, 1 mL/min flow rate, 2.5% isopropanol/97.5% hexane, *R* alcohol: 29.8 min, *S* alcohol: 33.7 min,  $\lambda = 254$  nm). NMR spectral data matched those reported previously.<sup>5</sup> Absolute stereochemistry was established by preparing an authentic sample of the *R* alcohol by ketone reduction with (+)-DIPCl, followed by a comparison of HPLC retention times.<sup>6</sup>

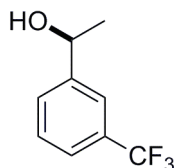

**(S)-1-(trifluoromethyl)phenylethanol (S)-8.**

From commercially available 1-(trifluoromethyl)phenylethanone following procedure A (with RS1ADH, 0.51 acetophenone U), the title compound was obtained with complete conversion and 99% ee for the *S* enantiomer, determined by chiral HPLC of the *p*-bromobenzoyl derivative with a Chiralcel OD column, 99% hexane/1% isopropanol, 1 ml/min at 254 nm. NMR spectral data matched those reported earlier.<sup>10</sup>

On a larger scale, a solution of 1-(trifluoromethyl)phenylethanone (188 mg, 1 mmol), NAD<sup>+</sup> (6.8 mg, 10  $\mu$ mol, 1 mol %), RS1ADH (41 acetophenone U), YADH (4 mg, 1.8 KU), YAIDH (10 mg, 11 U) and BSA (200 mg) in 36 mL KPO<sub>4</sub> buffer pH 7.5 (50 mM) and EtOH (4 mL) was shaken at 350 rpm and 30°C for 12h. The reaction mixture was extracted with Et<sub>2</sub>O, the organic phases dried over Na<sub>2</sub>SO<sub>4</sub> and evaporated to give 186 mg (98% yield) of (*S*)-1-(trifluoromethyl)phenylethanol in 99% ee.  $[\alpha]_D = -28.0^\circ$  (c 1.64, MeOH) for 99% ee,  $\{lit^{10}: [\alpha]_D = -27.9^\circ$  (c 1.64, MeOH) for >99% ee}.

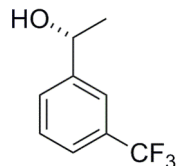

**(R)-1-(trifluoromethyl)phenylethanol (R)-8.**

A solution of 1-(trifluoromethyl)phenylethanone (188 mg, 1 mmol), NADP<sup>+</sup> (15.2 mg, 20  $\mu$ mol, 2 mol %, in two portions), LKADH (42 acetophenone U, in 3 portions), YAIDH (40 mg, 44 U) and BSA (200 mg) in 36 mL KPO<sub>4</sub> buffer pH 7.5 (50 mM) and EtOH (4 mL) was shaken at 350 rpm and 30°C for 30h. The reaction mixture was extracted with Et<sub>2</sub>O, the organic phases dried over Na<sub>2</sub>SO<sub>4</sub> and evaporated, along with residual ketone, to give 122 mg (64% yield) of (*R*)-1-(trifluoromethyl)phenylethanol compound in 86% ee.

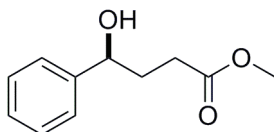

**(S)-Methyl 4-hydroxy-4-phenylbutyrate (10).**

From commercially available methyl 3-benzoylpropionate and following procedure A with KRED 132 (0.19 acetophenone U), the title compound was obtained in 97% ee *S* enantiomer (@ 82% conversion), as determined by

chiral HPLC (Chiralcel OD column, 1 mL/min flow rate, 1.5% isopropanol/98.5 % hexane,  $\lambda = 220$  nm). NMR spectral data were identical to those reported.<sup>8</sup> Absolute stereochemistry was determined by comparison of HPLC retention time with a known standard. Specifically, methyl 3-benzoylpropionate was asymmetrically reduced using the (*S*)-B-Me-Itsuno-Corey oxazaborolidine catalyst to give the *R* enantiomer.<sup>9</sup>

On a larger scale, a solution of 3 methyl 3-benzoylpropionate (192 mg, 1 mmol), NADP<sup>+</sup> (7.6 mg, 10  $\mu$ mol, 1 mol %), KRED132 (9.5 acetophenone U), LKADH (50 mg, 20 acetophenone U), YALDH (50 mg, 55 U), BSA (200 mg) and glycerol (5 mL) in 93 mL KPO<sub>4</sub> buffer pH 7.5 (50 mM) and EtOH (2 mL) was shaken at 350 rpm and 30°C for 12h. The reaction mixture was extracted with Et<sub>2</sub>O, the organic phases dried over Na<sub>2</sub>SO<sub>4</sub>, evaporated and the residue purified by column chromatography on silica gel to give 150 mg of a 60:40 mixture of lactone and alcohol (86% yield) in 96% ee.

Some cyclization of the  $\gamma$ -hydroxy ester occurred under the reaction conditions. The resulting lactone can be converted to an intermediate in the synthesis of the targeted drug ((*R*)-Fluoxetine) under the same reaction conditions as for the  $\gamma$ -hydroxy ester.<sup>9</sup>

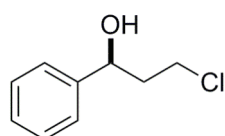

**(*S*)-3-Chloro-1-phenylpropan-1-ol (12).**

From commercially available 3-chloro-1-phenylpropan-1-one, following procedure A, with KRED 108 (0.07 acetophenone U), was obtained (*S*)-3-chloro-1-phenylpropan-1-ol in 88% ee (@ 85% conversion) as determined by chiral HPLC (Chiralcel OD column, 1 mL/min flow rate, 10% isopropanol/90% hexane,  $\lambda = 220$  nm). NMR spectra matched literature data.<sup>1</sup> [ $\alpha$ ]<sub>D</sub> = -24.1° (c 1.1, CHCl<sub>3</sub>) for 88% ee, {lit<sup>10</sup>: [ $\alpha$ ]<sub>D</sub> = -23.5° (c 1, CHCl<sub>3</sub>) for 99% ee}.

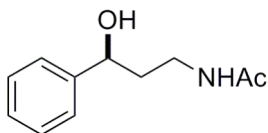

**(*S*)-N-(3-hydroxy-3-phenylpropyl)acetamide (14).**

From N-(3-oxo-3-phenylpropyl)acetamide **13** following procedure A (5  $\mu$ mol substrate, with KRED132, 0.38 acetophenone U and 3 eq. NADPH), the title compound was obtained with 67 % conversion and >99% ee for the *S* enantiomer, determined by chiral HPLC with a Chiralcel OD column, 94% hexane/6% isopropanol, 1 ml/min at 210 nm. NMR spectral data matched those reported earlier.<sup>11</sup> [ $\alpha$ ]<sub>D</sub> = -19.5° (c 0.09, CHCl<sub>3</sub>) for 99% ee, {lit<sup>11</sup>: [ $\alpha$ ]<sub>D</sub> = -23.6° (c 1.3, CHCl<sub>3</sub>) for >99% ee}.

### III. Thermodynamics/Economics of Nicotinamide Cofactor Reductants

#### A. Calculation of the $\Delta G'$ of the EtOH-mediated NAD(P)H recycling reaction:

From Alberty, R. A. *Arch. Biochem. Biophys.* **1993**, 307, 8-14:

@ P = 1 Bar, T = 25°C and I (ionic strength) = 0.1:

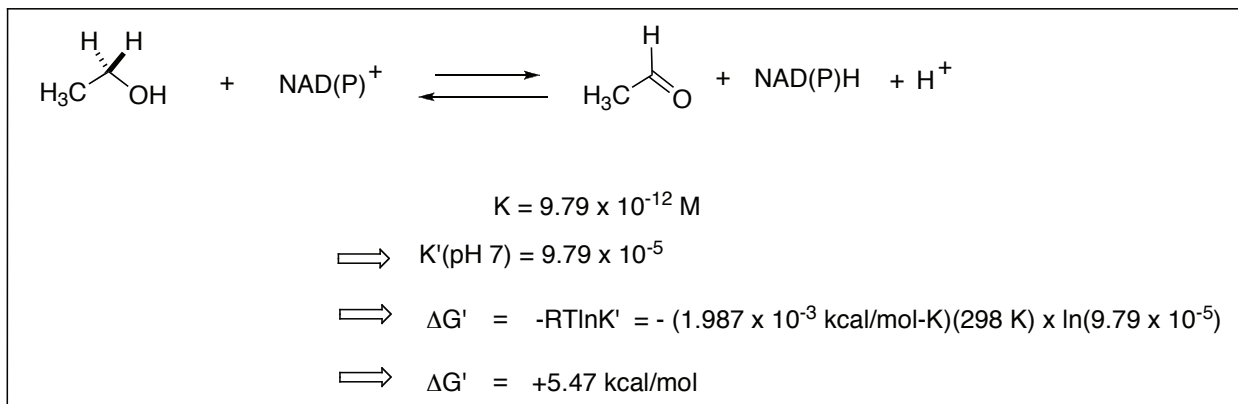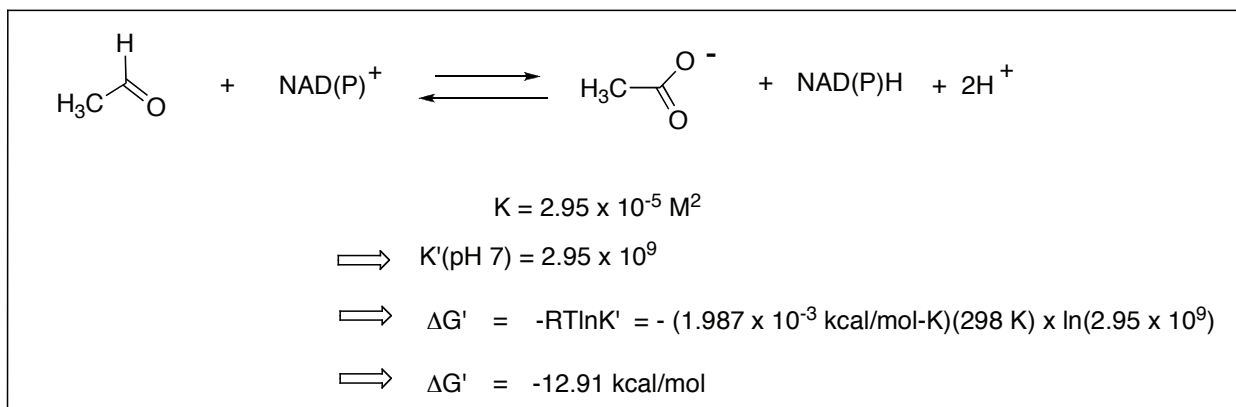

$$\text{Overall: } \Rightarrow \Delta G' = -7.44 \text{ kcal/mol}$$

#### B. Estimates of $\Delta G'$ values for NAD(P)H regeneration with the other reductants were obtained as follows:

**Glucose DH reaction** (-6.92 kcal/mol from Strecker, H. J. and Korke, S. *J. Biol. Chem.* **1952**, 196, 769-784)

**Phosphite DH reaction** (-15 kcal/mol from van Relyea, H. A.; van der Donk, W. A., *Bioorganic Chemistry* **2005**, 33, 171-189)

**Formate DH reaction** @ pH 7, 298 K Alberty lists  $\Delta G' = -19.41 \text{ kJ/mol} \div 4.184 = -4.6 \text{ kcal/mol}$  (Alberty, R. A. *Biophysical Chemistry* **2004**, 111, 115-122).

**C. Estimates of Reductant Cost:**

**Ethanol pricing:** \$2.20/gallon on 09/20/08 (see <http://www.dtnethanolcenter.com/index.cfm?show=10&mid=32>)

Where 1 gallon = 3.785 L (0.58/L) and density = 0.789 g/mL and MW = 46.07 g/mol, meaning:

EtOH =  $(0.58/L \div 789 \text{ g/L}) \times 46.07 \text{ g/mol} = 3.39\text{¢}$  per mole 25.6 x cheaper than D-Glucose

**Glucose (Dextrose) pricing:**

\$3.99/2 lb on 09/20/08 {see <http://wholesalesupplementstore.com/now-dextrose.html> (best price) or [http://www.bulknutrition.com/p510\\_Dextrose\\_Now\\_Foods.html](http://www.bulknutrition.com/p510_Dextrose_Now_Foods.html)}  
(\$2.00/lb  $\div$  454 g/lb)  $\times$  198 g/mol (dextrose-monohydrate) = 87.0 ¢ per mole

**Sodium formate pricing:**

\$60.80/kg (VWR price on 09/20/08) @ 68.01 g/mol  
So, we have  $\$0.068/g \times 68.01 \text{ g/mol} = \$4.14/\text{mol}$

**Phosphorous acid pricing:**

\$54.50/500 g (Cole Parmer price on 09/20/08) @ 82.00 g/mol  
So, we have  $\$0.109/g \times 82 \text{ g/mol} = \$8.94/\text{mol}$

#### IV. NMR Model Study – Effect of YAIDH (four electron redox conditions)

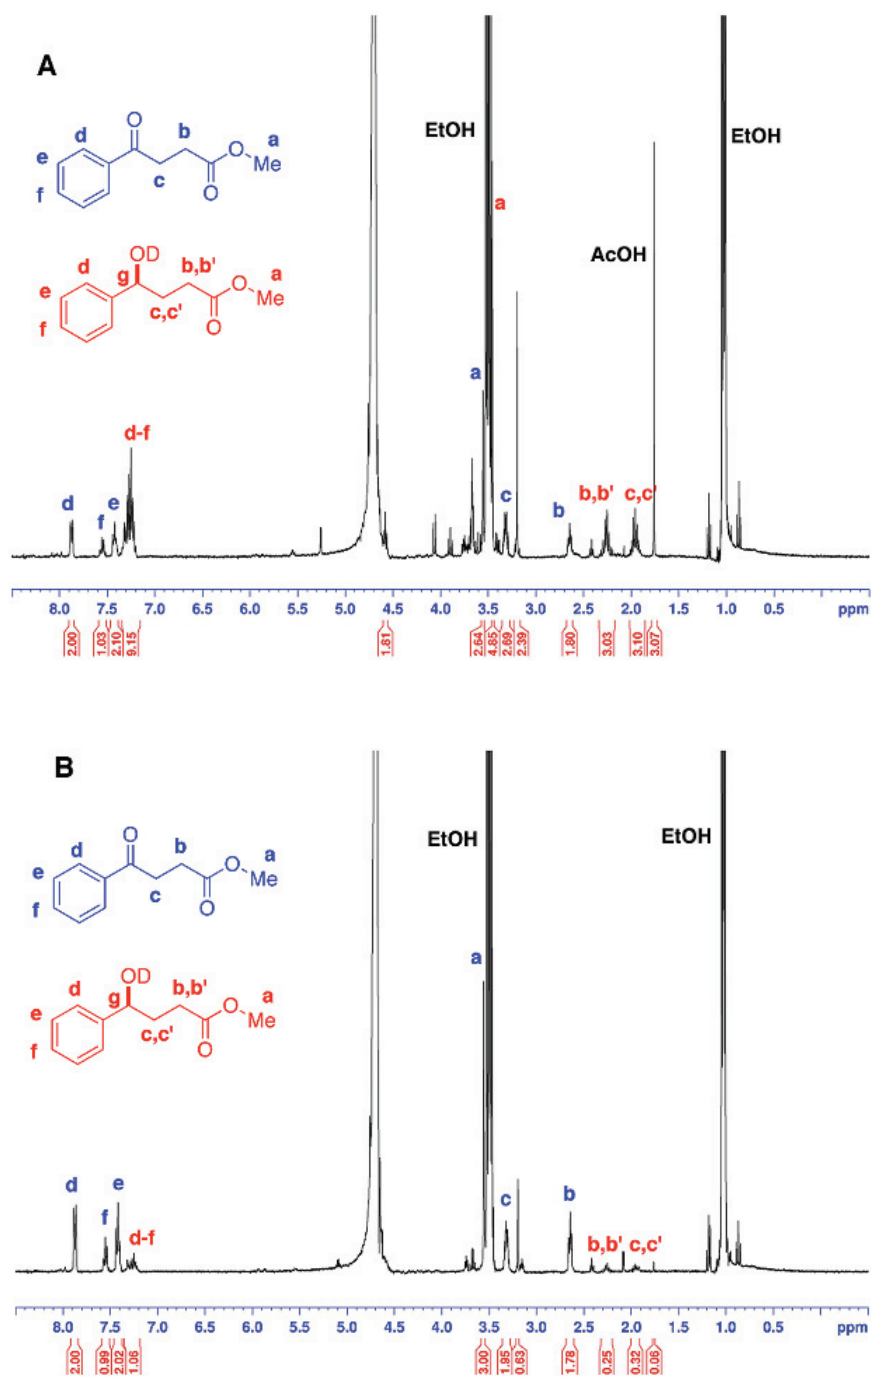

Conditions: A solution of methyl 3-benzoylpropionate (0.96 mg, 5 mM), NADP<sup>+</sup> (0.1 μmol, 100 μM, 2 mol %), KRED132 (1 mg, 0.19 acetophenone U), LKADH (0.5 mg, 0.2 acetophenone U), EtOH (5.8 μL, 100 mM) with (A) or without (B) YAIDH (0.5 mg, 0.55 U) in deuterated KPO<sub>4</sub> buffer pH 7.5 (50 mM, 1mL final volume) was shaken at 300 rpm and 30°C for 3h. <sup>1</sup>H NMR spectra were recorded on Bruker-DRX-Avance-400 MHz instrument.



## References

- 1- D. Pollard, M. Truppo, J. Pollard, C-Y. Chen, J. Moore, *Tetrahedron: Asymmetry*, **2006**, *17*, 554-559.
- 2- Synthesized from saffrole in two steps: oxymercuration (83%) followed by PCC oxidation (80%).
- 3- M. J. Zmijewski, J. Vicenzi, B. E. Landen, W. Muth, P. Marler, B. Anderson, *Appl. Microbiol. Biotechnol* **1997**, *47*, 162-166.
- 4- B. A. Anderson, M. M. Hansen, A. R. Harkness, C. L. Henry, J. T. Vicenzi, M. J. Zmijewski, *J. Am. Chem. Soc.*, **1995**, *117*, 12358-12359.
- 5- B. H. Lipshutz, A. Lower, R. J. Kucejko, K. Noson, *Org. Lett.*, **2006**, *8*, 2969-2972.
- 6- C. Mordant, S. Reymond, H. Tone, D. Lavergne, R. Touati, B. B. Hassine, V. Ratovelomanana-Vidal, J.-P. Genet, *Tetrahedron*, **2007**, *63*, 6115-6123.
- 7- K. Tanaka, M. Katsurada, F. Ohno, Y. Shiga, M. Oda, *J. Org. Chem.*, **2000**, *65*, 432-437.
- 8- A. L. Gutman, K. Zuobi, T. Bravdo, *J. Org. Chem.*, **1990**, *55*, 3546-3552.
- 9- J. W. Hilborn, Z.- H. Lu, A. R. Jurgens, Q. K. Fang, P. Byers, S. A. Wald, C. H. Senanayake, *Tetrahedron Letters*, **2001**, *42*, 8919-8921.
- 10- A. A. M. Lapis, A. de Fatima, J. E. D. Martins, V. E. U. Costa, R. A. Pilli, *Tetrahedron Letters*, **2005**, *46*, 495-498.
- 11- D. D. Caspi, D. C. Ebner, J. T. Bagdanoff, B. M. Stoltz, *Adv. Synth. Catal.*, **2004**, *346*, 185-189.

## V. HPLC Traces/Mosher Esters

Conditions: Column Chiralcel OD, Eluent: isopropanol/hexane 1:99, Flow rate: 1 mL/min,  $\lambda = 265$  nm.

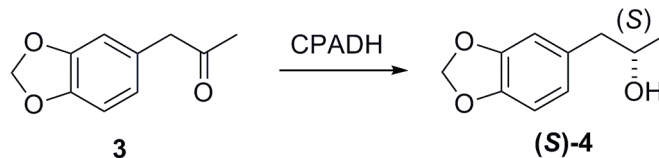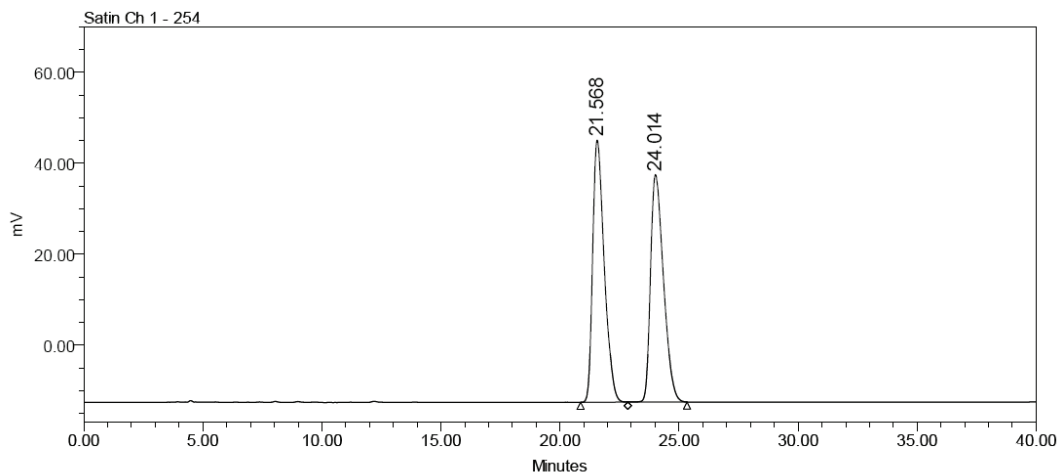

|   | RT     | Area    | % Area | Height |
|---|--------|---------|--------|--------|
| 1 | 21.568 | 1950082 | 50.70  | 57632  |
| 2 | 24.014 | 1896009 | 49.30  | 50019  |

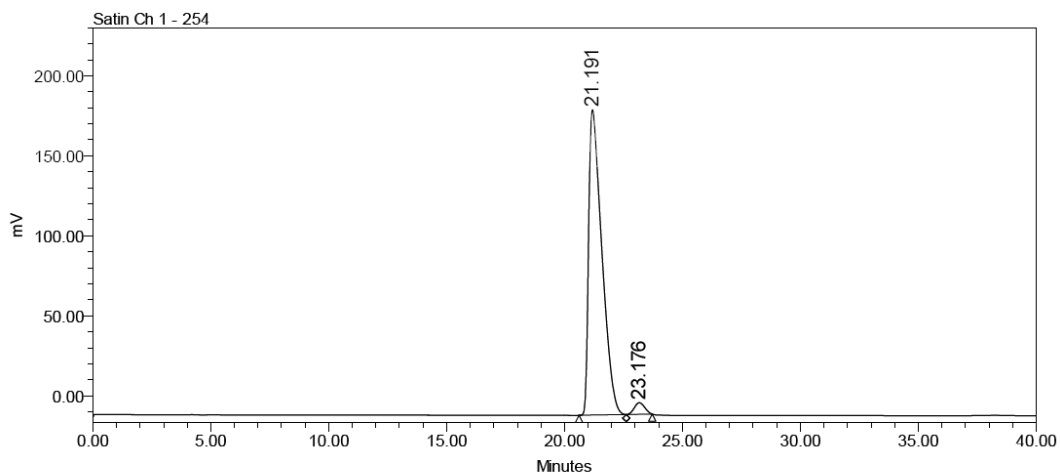

|   | RT     | Area    | % Area | Height |
|---|--------|---------|--------|--------|
| 1 | 21.191 | 7432788 | 97.12  | 190995 |
| 2 | 23.176 | 220706  | 2.88   | 7208   |

Conditions: Column Chiralcel OD, Eluent: isopropanol/hexane 2.5:97.5, Flow rate: 1 mL/min,  $\lambda$  = 254 nm.

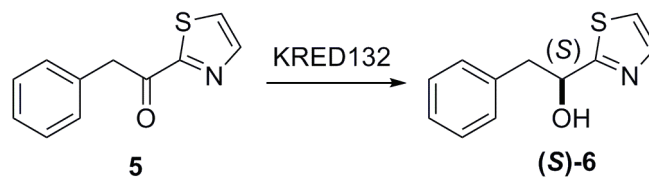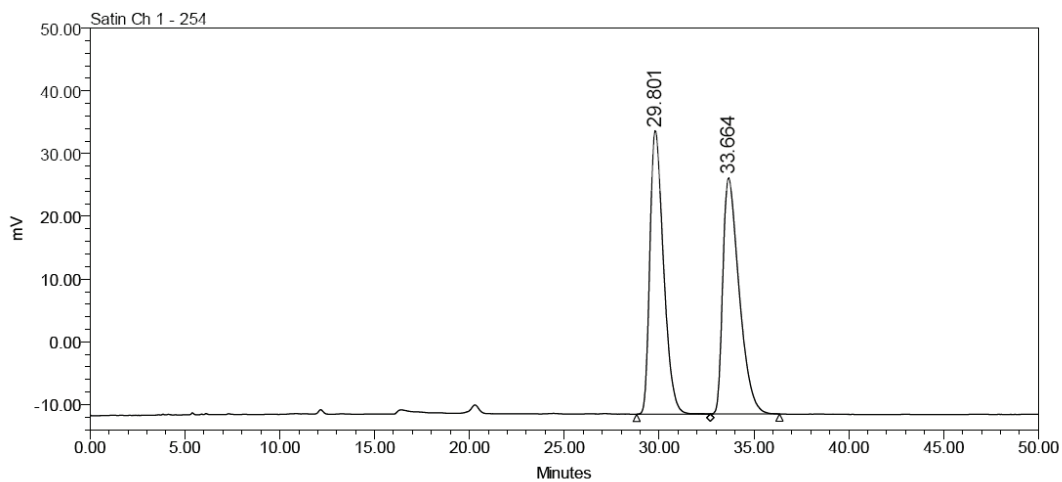

|   | Peak Name | RT     | Area    | % Area | Height |
|---|-----------|--------|---------|--------|--------|
| 1 | Peak1     | 29.801 | 2264160 | 50.09  | 45209  |
| 2 | Peak2     | 33.664 | 2256054 | 49.91  | 37621  |

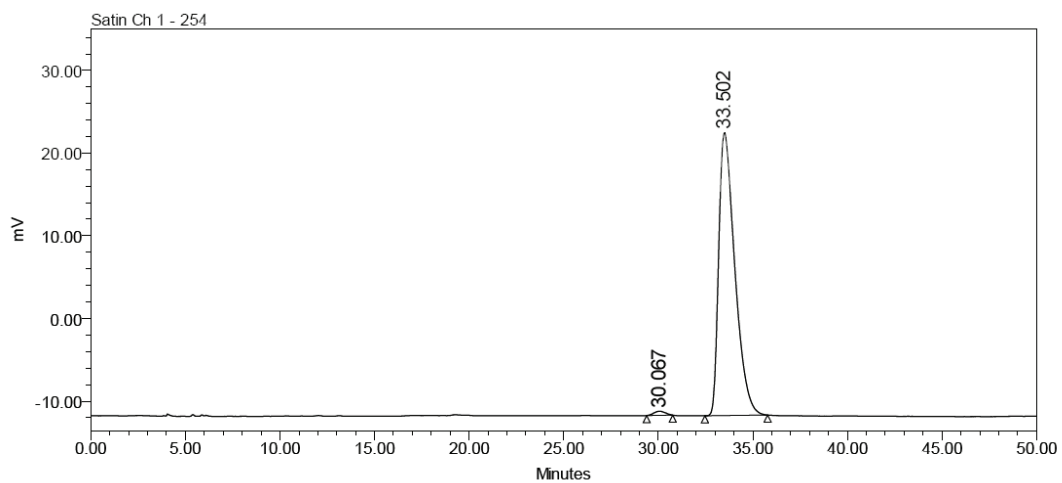

|   | Peak Name | RT     | Area    | % Area | Height |
|---|-----------|--------|---------|--------|--------|
| 1 | Peak1     | 30.067 | 21069   | 1.03   | 500    |
| 2 | Peak2     | 33.502 | 2023789 | 98.97  | 34195  |

Conditions: Column Chiralcel OD, Eluent: isopropanol/hexane 2.5:97.5, Flow rate: 1 mL/min,  $\lambda$  = 254 nm.

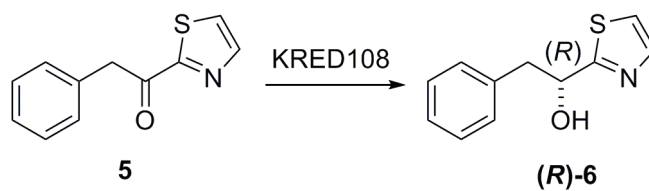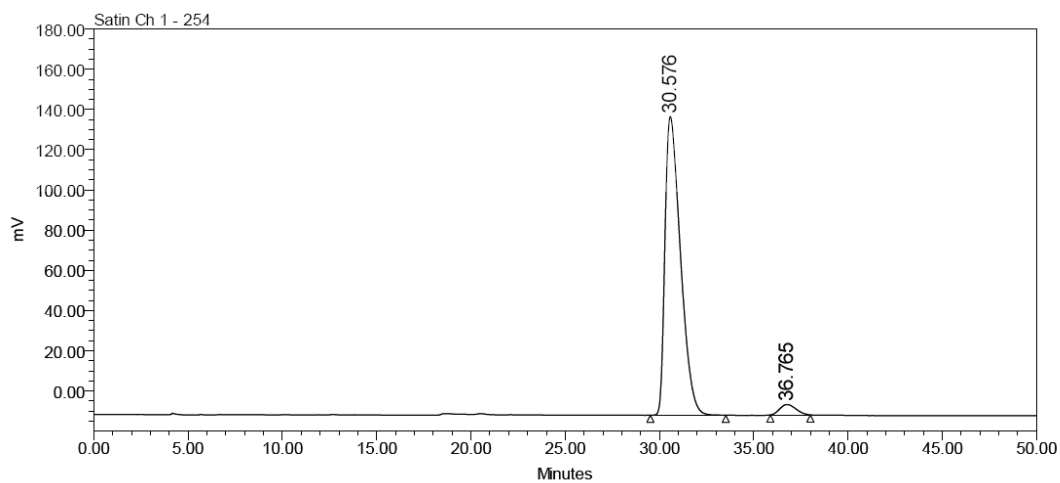

|   | RT     | Area    | % Area | Height |
|---|--------|---------|--------|--------|
| 1 | 30.576 | 8475141 | 96.51  | 148536 |
| 2 | 36.765 | 306239  | 3.49   | 5165   |

Conditions: Column Chiralcel OD, Eluent: isopropanol/hexane 1.5:98.5, Flow rate: 1 mL/min,  $\lambda$  = 220 nm.

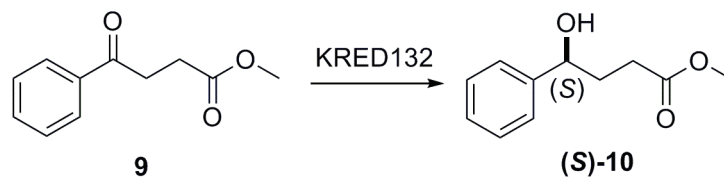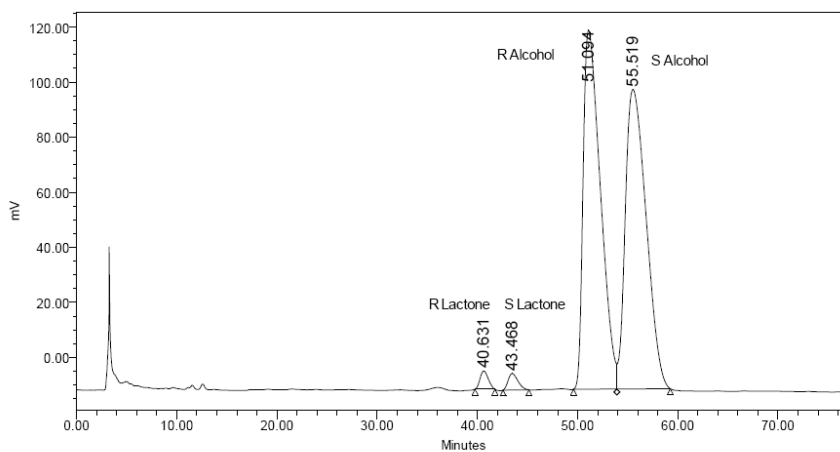

|   | RT     | Area     | % Area | Height |
|---|--------|----------|--------|--------|
| 1 | 40.631 | 382296   | 1.19   | 6663   |
| 2 | 43.468 | 405163   | 1.26   | 5978   |
| 3 | 51.094 | 15594875 | 48.53  | 130391 |
| 4 | 55.519 | 15752099 | 49.02  | 108803 |

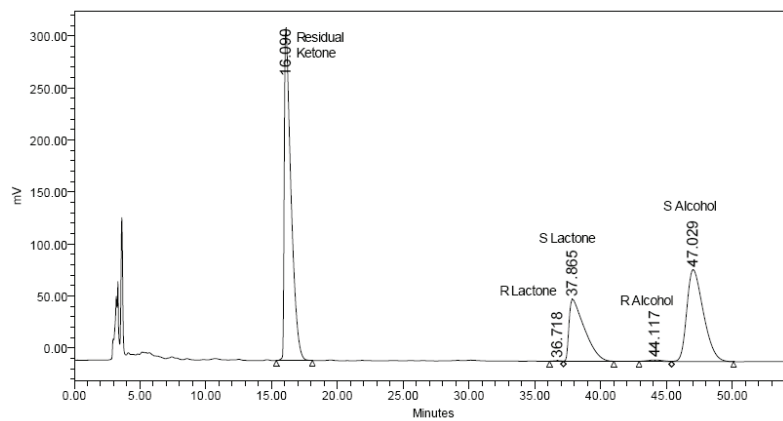

|   | RT     | Area     | % Area | Height |
|---|--------|----------|--------|--------|
| 1 | 16.090 | 11292184 | 47.08  | 320007 |
| 2 | 36.718 | 18317    | 0.08   | 478    |
| 3 | 37.865 | 4827002  | 20.13  | 59391  |
| 4 | 44.117 | 101210   | 0.42   | 1338   |
| 5 | 47.029 | 7745808  | 32.30  | 88228  |

Conditions: Column Chiralcel OD, Eluent: isopropanol/hexane 1:99, Flow rate: 1 mL/min,  $\lambda = 254$  nm.

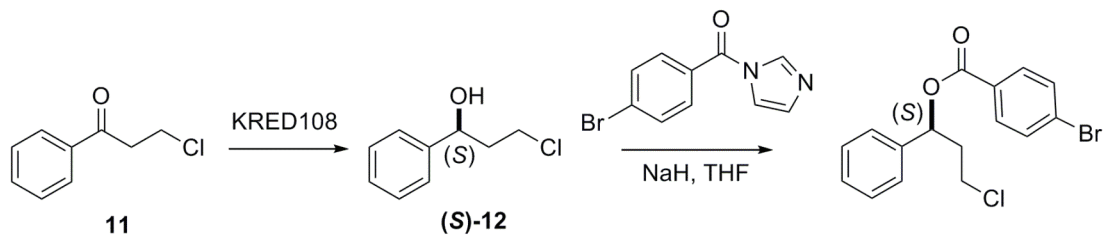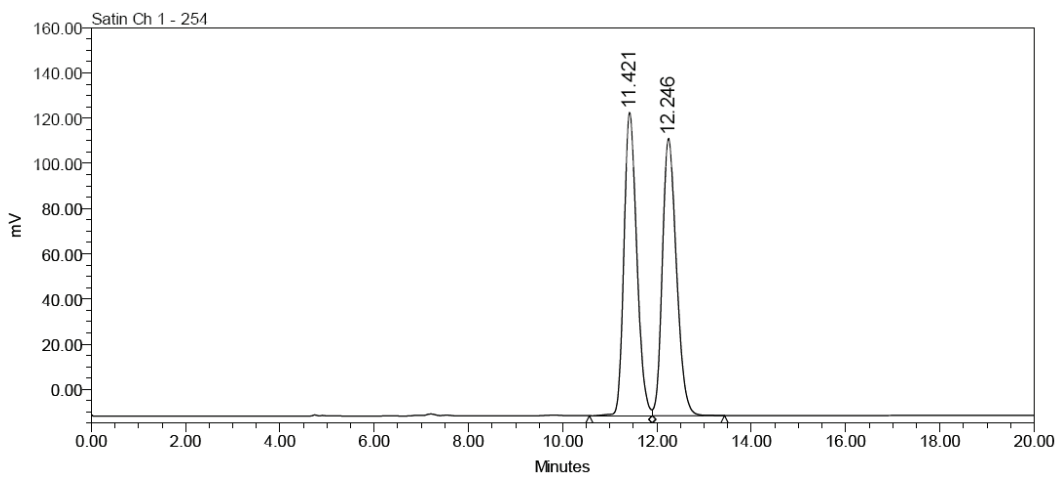

| Peak Name | RT     | Area    | % Area | Height |
|-----------|--------|---------|--------|--------|
| 1 Peak1   | 11.421 | 2542025 | 49.94  | 134343 |
| 2 Peak2   | 12.246 | 2547637 | 50.06  | 122780 |

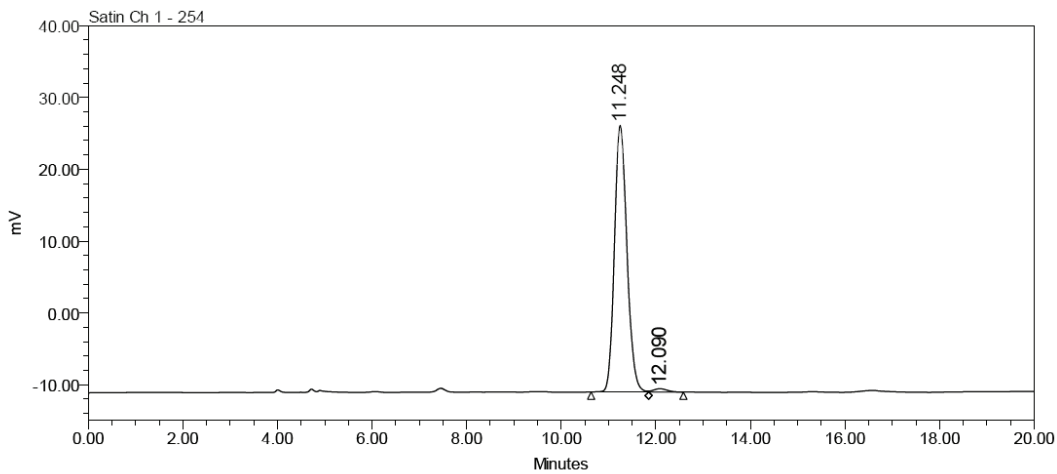

| RT       | Area   | % Area | Height |
|----------|--------|--------|--------|
| 1 11.248 | 683397 | 98.63  | 37167  |
| 2 12.090 | 9495   | 1.37   | 468    |

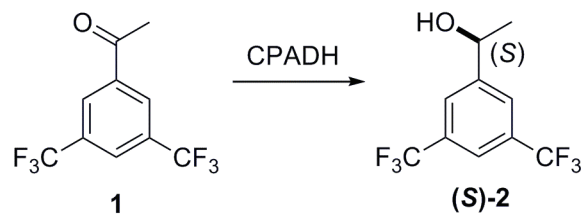

$^1\text{H}$  NMR section ( $\text{CDCl}_3$ , 400 MHz) of the Mosher ester derivatives.

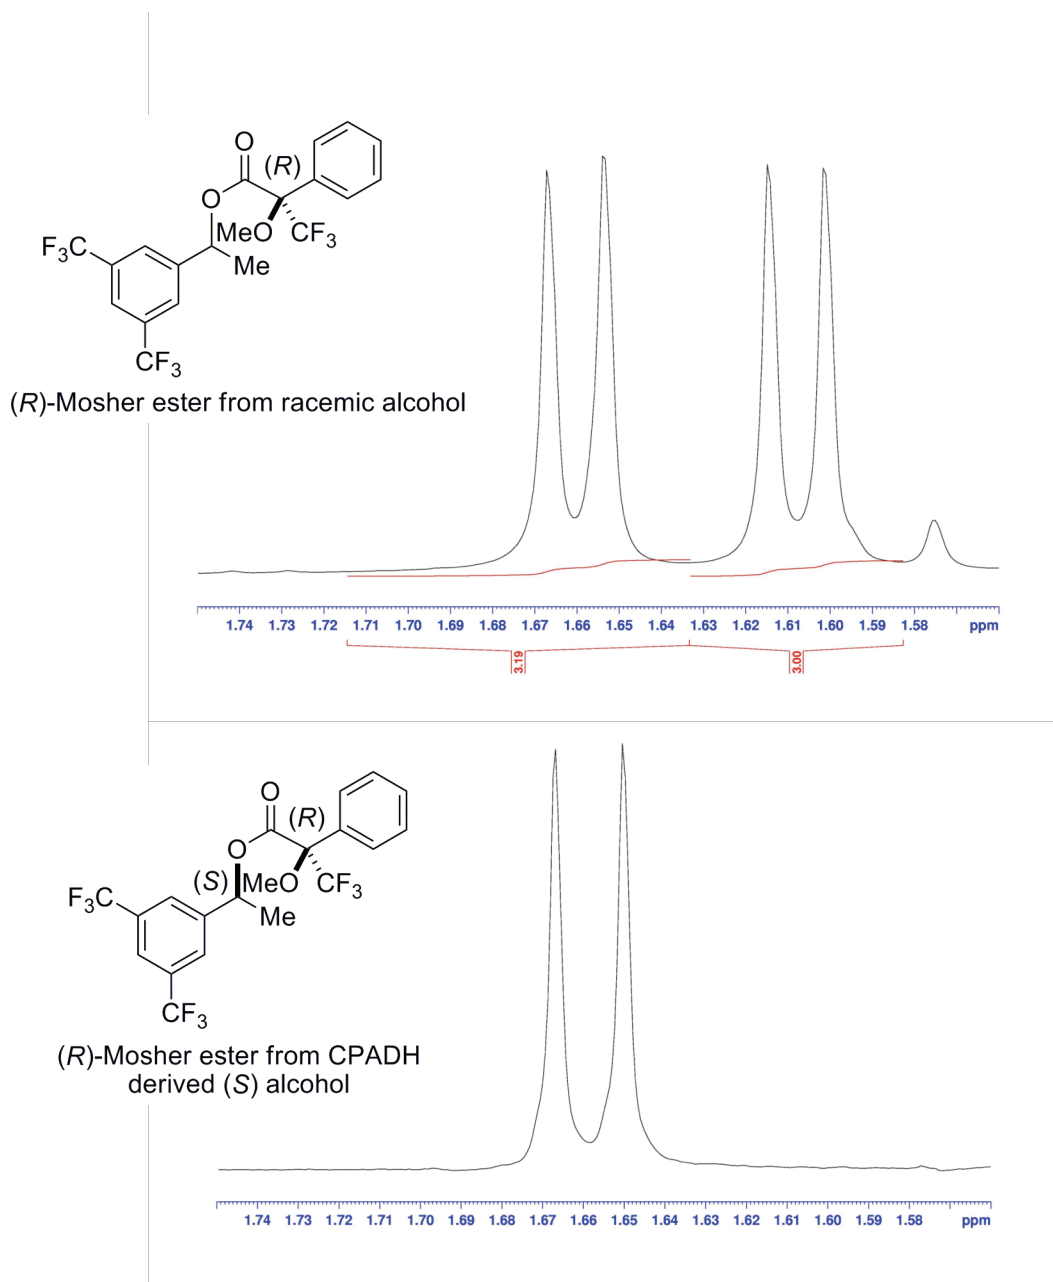

Conditions: Column Chiralcel OD, Eluent: isopropanol/hexane 1:99, Flow rate: 1 mL/min,  $\lambda = 254$  nm.

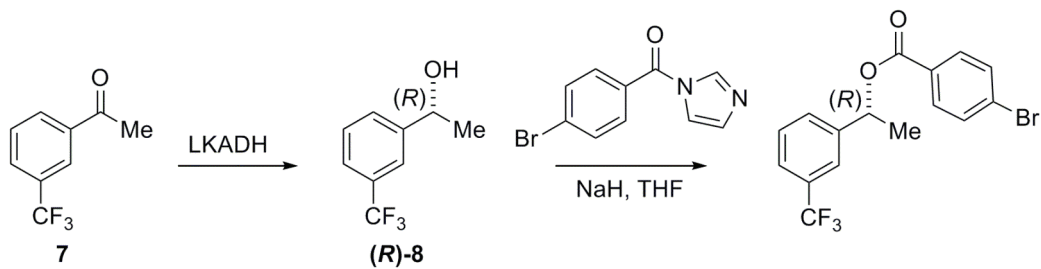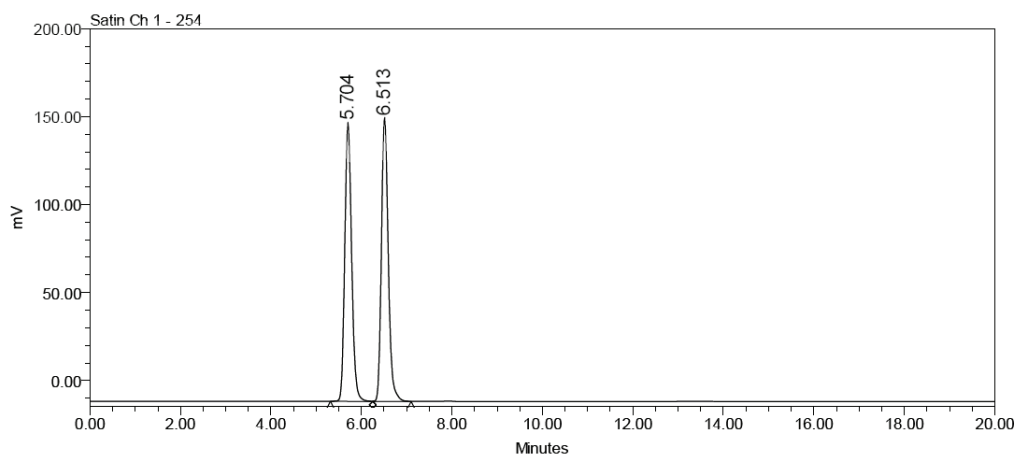

|   | RT    | Area    | % Area | Height |
|---|-------|---------|--------|--------|
| 1 | 5.704 | 1671003 | 49.61  | 158699 |
| 2 | 6.513 | 1697065 | 50.39  | 161583 |

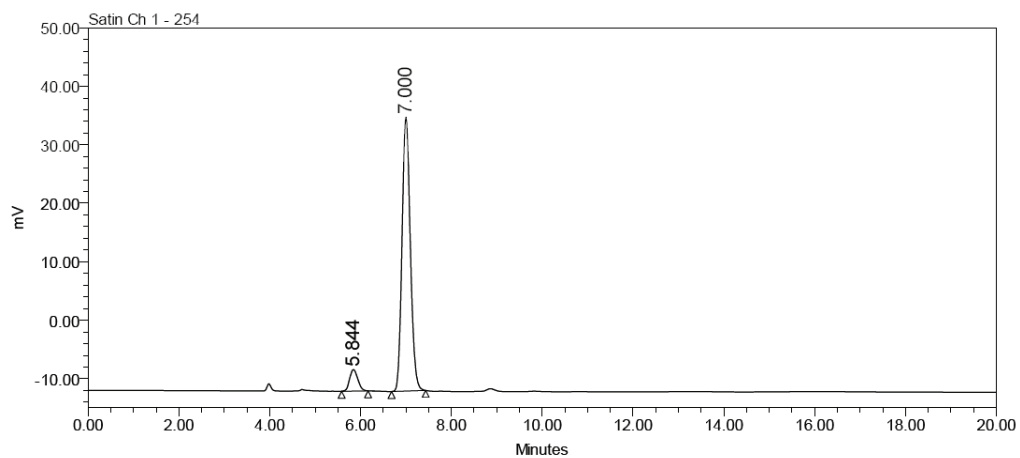

|   | Peak Name | RT    | Area   | % Area | Height |
|---|-----------|-------|--------|--------|--------|
| 1 | Peak1     | 5.844 | 46140  | 7.20   | 3682   |
| 2 | Peak2     | 7.000 | 594773 | 92.80  | 46799  |



Conditions: Column Chiralcel OD, Eluent: isopropanol/hexane 1:99, Flow rate: 1 mL/min,  $\lambda = 254$  nm.

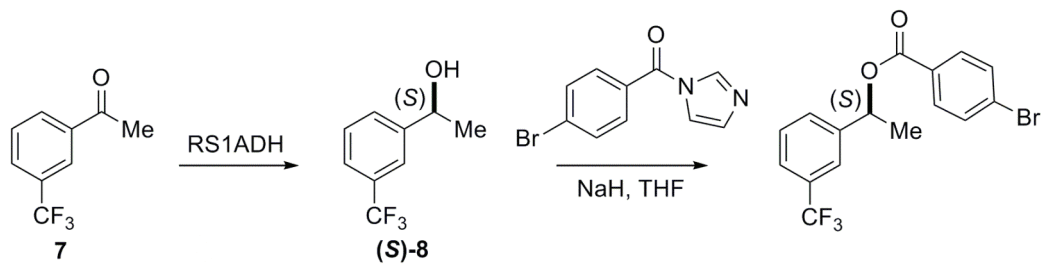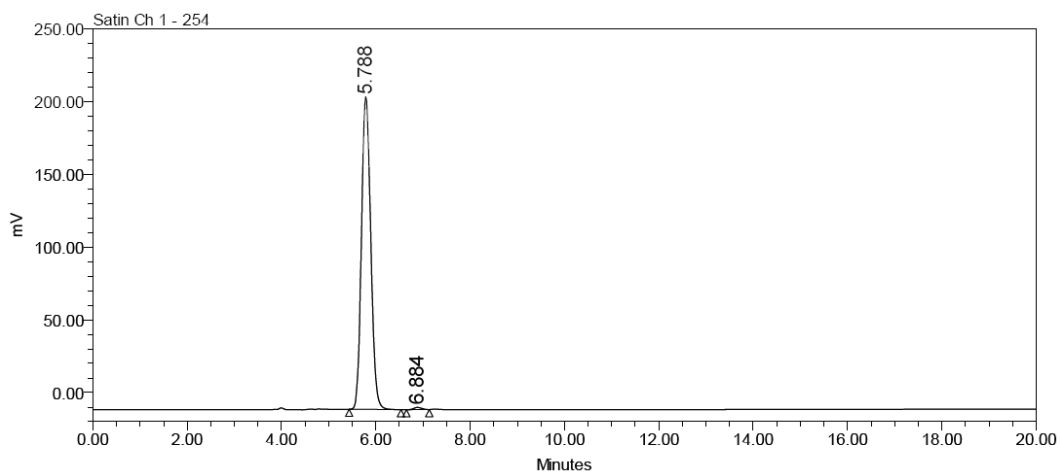

|   | Peak Name | RT    | Area    | % Area | Height |
|---|-----------|-------|---------|--------|--------|
| 1 | Peak1     | 5.788 | 2944227 | 99.42  | 214980 |
| 2 | Peak2     | 6.884 | 17078   | 0.58   | 1524   |

Conditions: Column Chiralcel OD, Eluent: isopropanol/hexane 6:94, Flow rate: 1 mL/min,  $\lambda = 210$  nm.

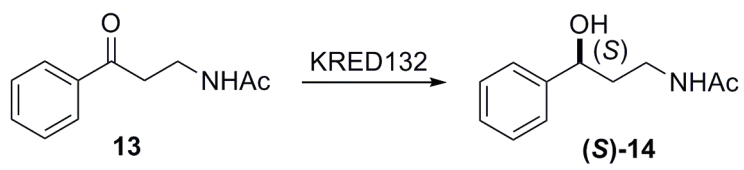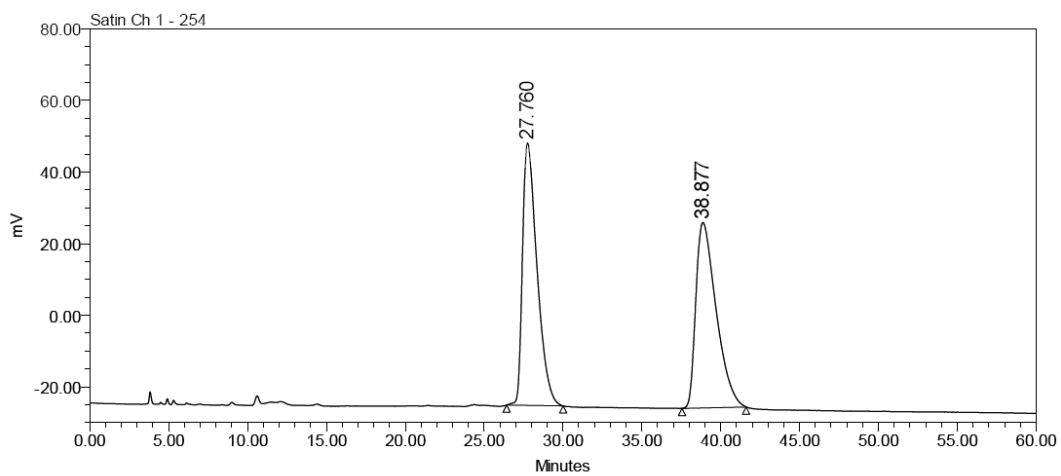

|   | Peak Name | RT     | Area    | % Area | Height |
|---|-----------|--------|---------|--------|--------|
| 1 | Peak1     | 27.760 | 4682637 | 50.27  | 73256  |
| 2 | Peak2     | 38.877 | 4631813 | 49.73  | 51762  |

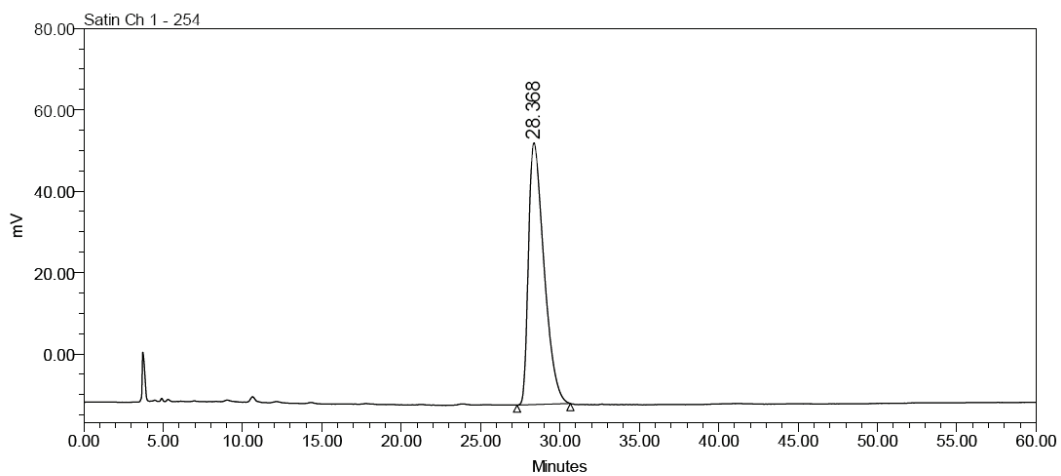

|   | Peak Name | RT     | Area    | % Area | Height |
|---|-----------|--------|---------|--------|--------|
| 1 | Peak1     | 28.368 | 4387085 | 100.00 | 64357  |

## VI. $^1\text{H}$ and $^{13}\text{C}$ NMR Spectra

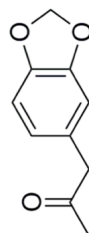

( $^1\text{H}$  NMR, 400 MHz,  $\text{CDCl}_3$ )

**3**

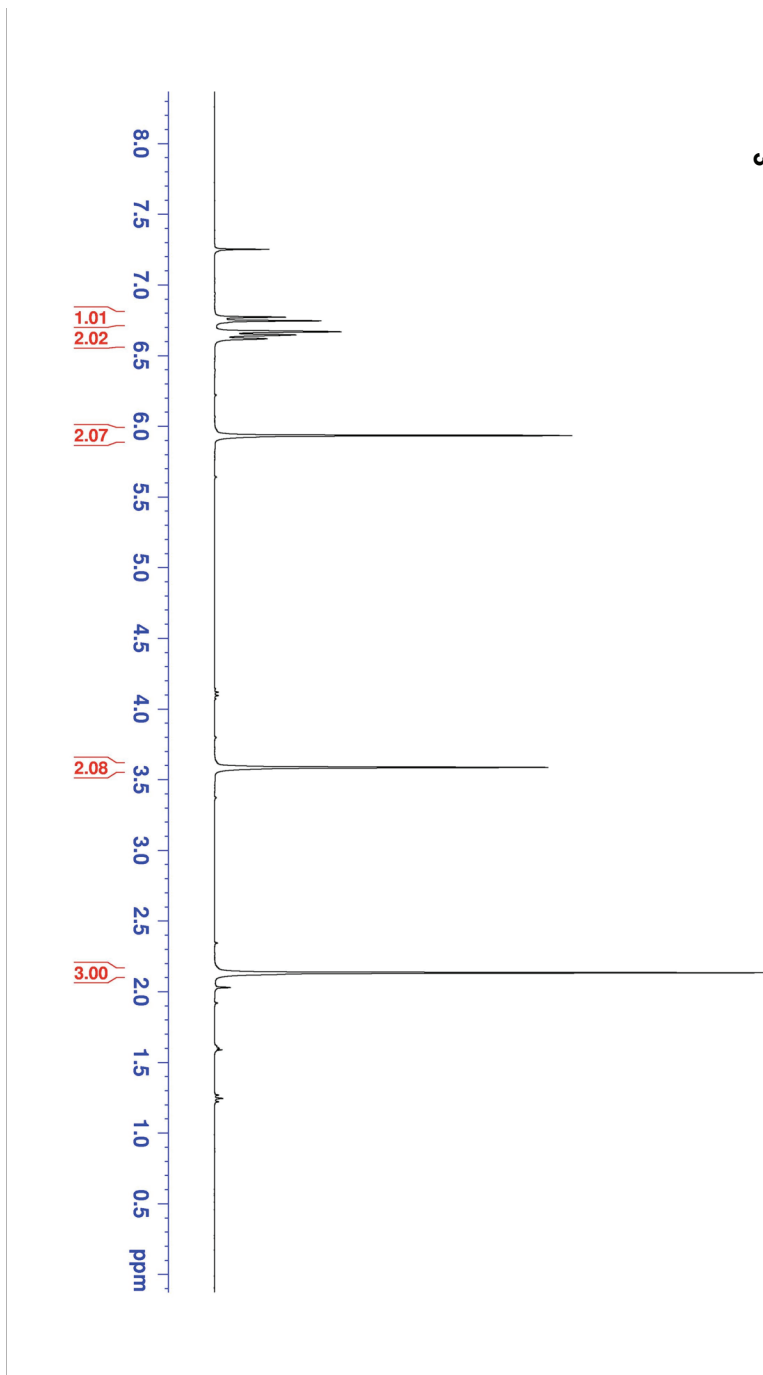

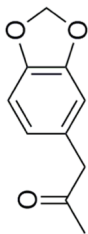

(<sup>13</sup>C NMR, 100 MHz, CDCl<sub>3</sub>)

3

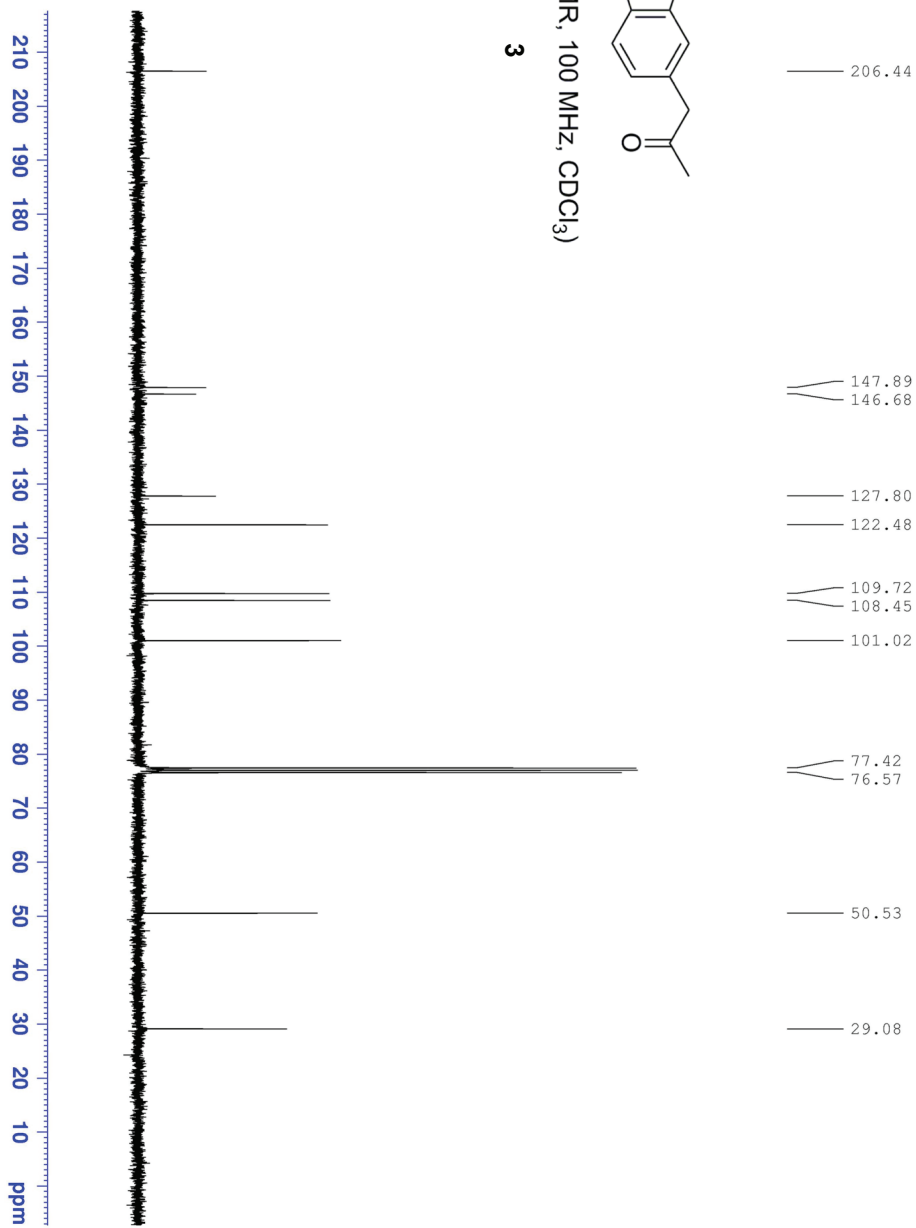

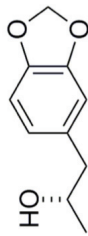

(<sup>1</sup>H NMR, 300 MHz, CDCl<sub>3</sub>)

(S)-4

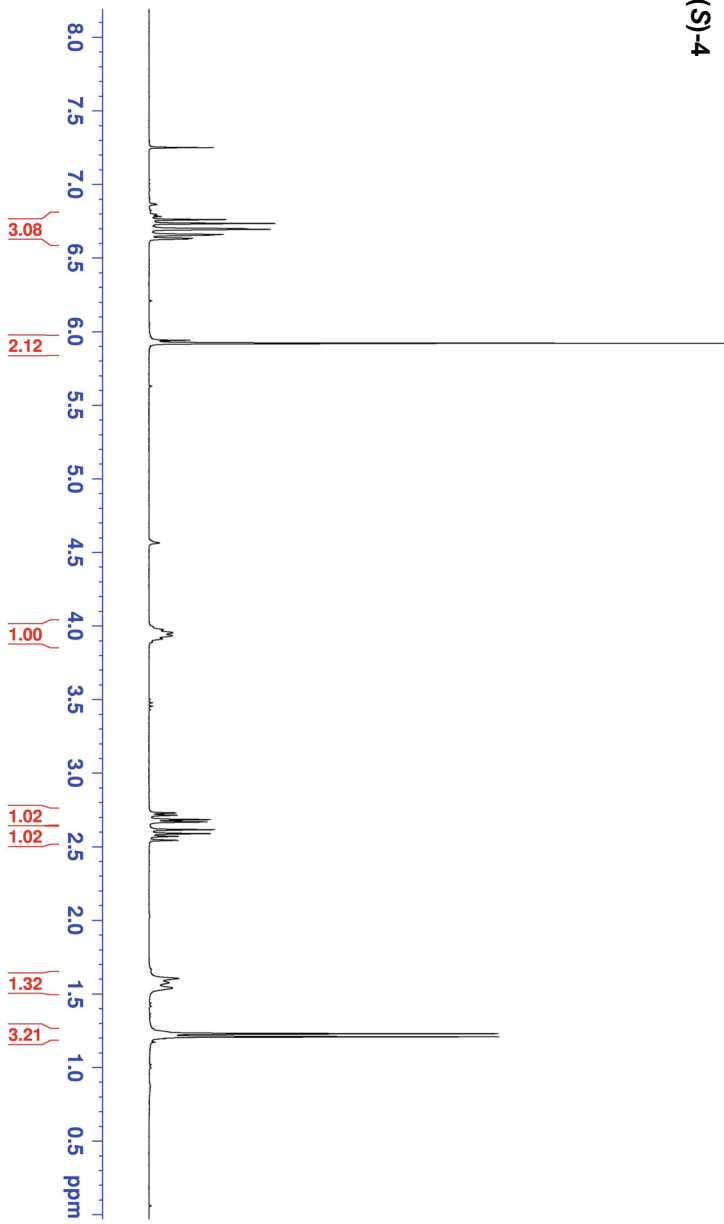

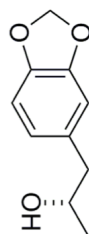

(<sup>13</sup>C NMR, 100 MHz, CDCl<sub>3</sub>)

(S)-4

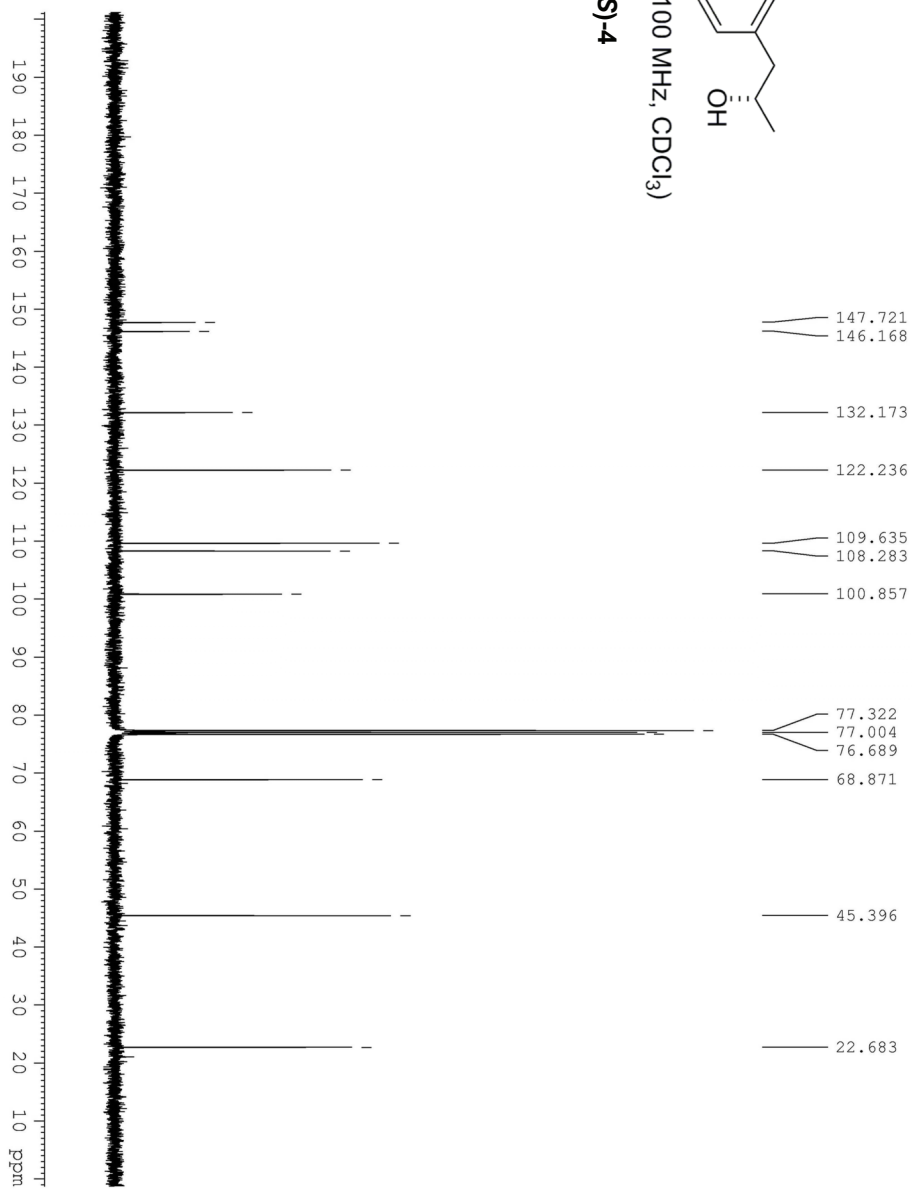

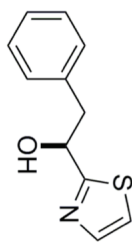

(<sup>1</sup>H NMR, 400 MHz, CDCl<sub>3</sub>)

(S)-6

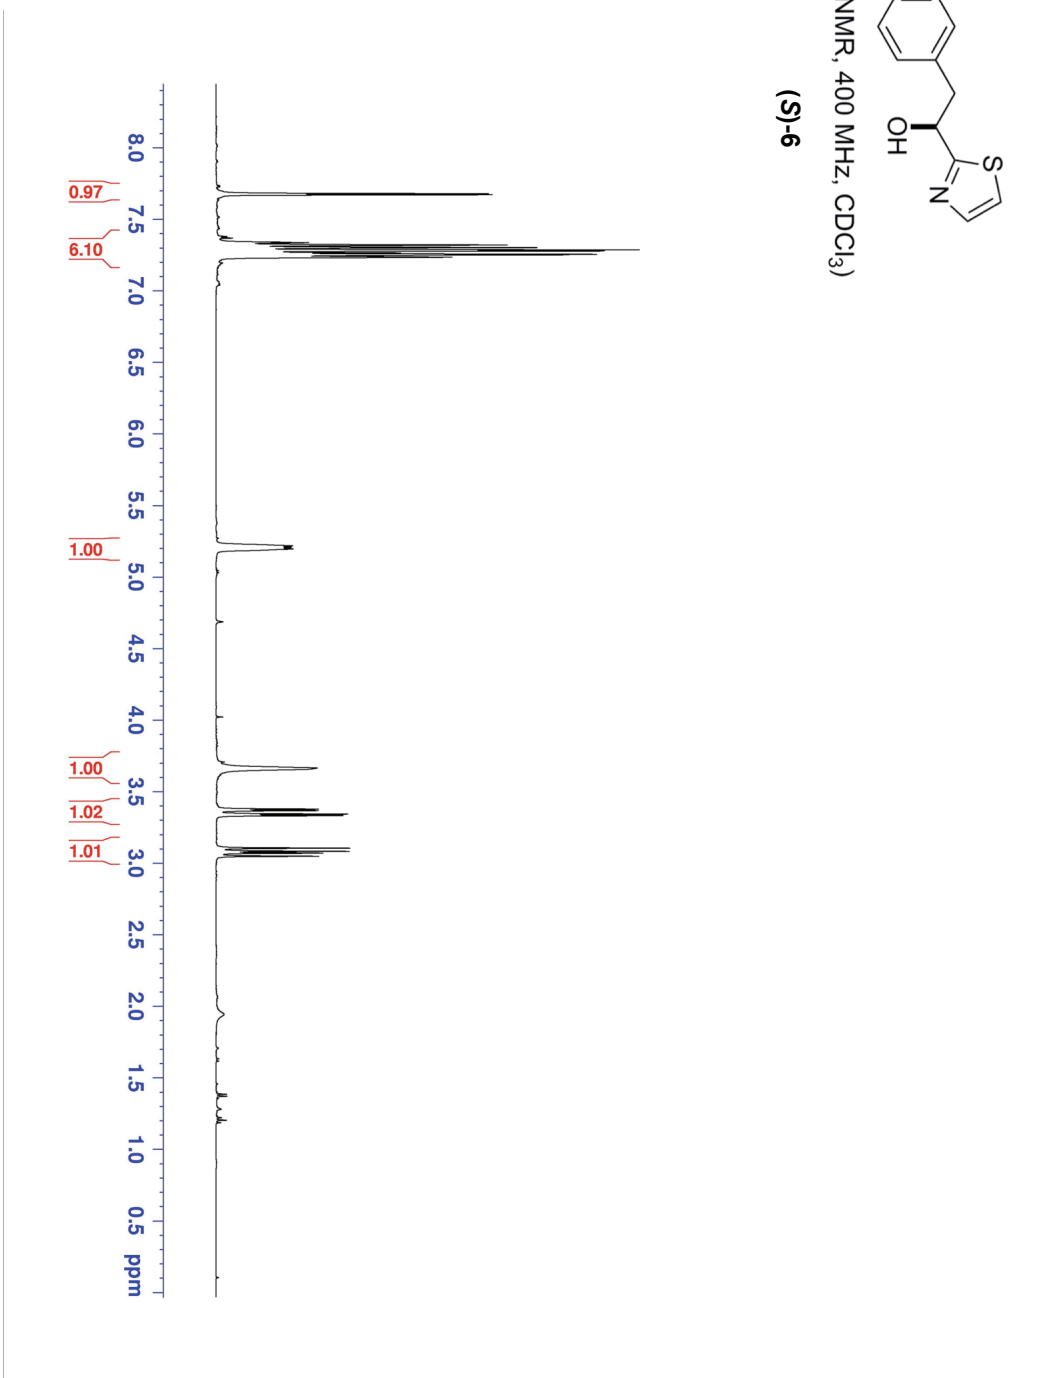

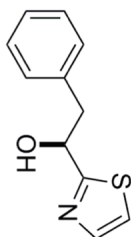

(<sup>13</sup>C NMR, 100 MHz, CDCl<sub>3</sub>)

(S)-6

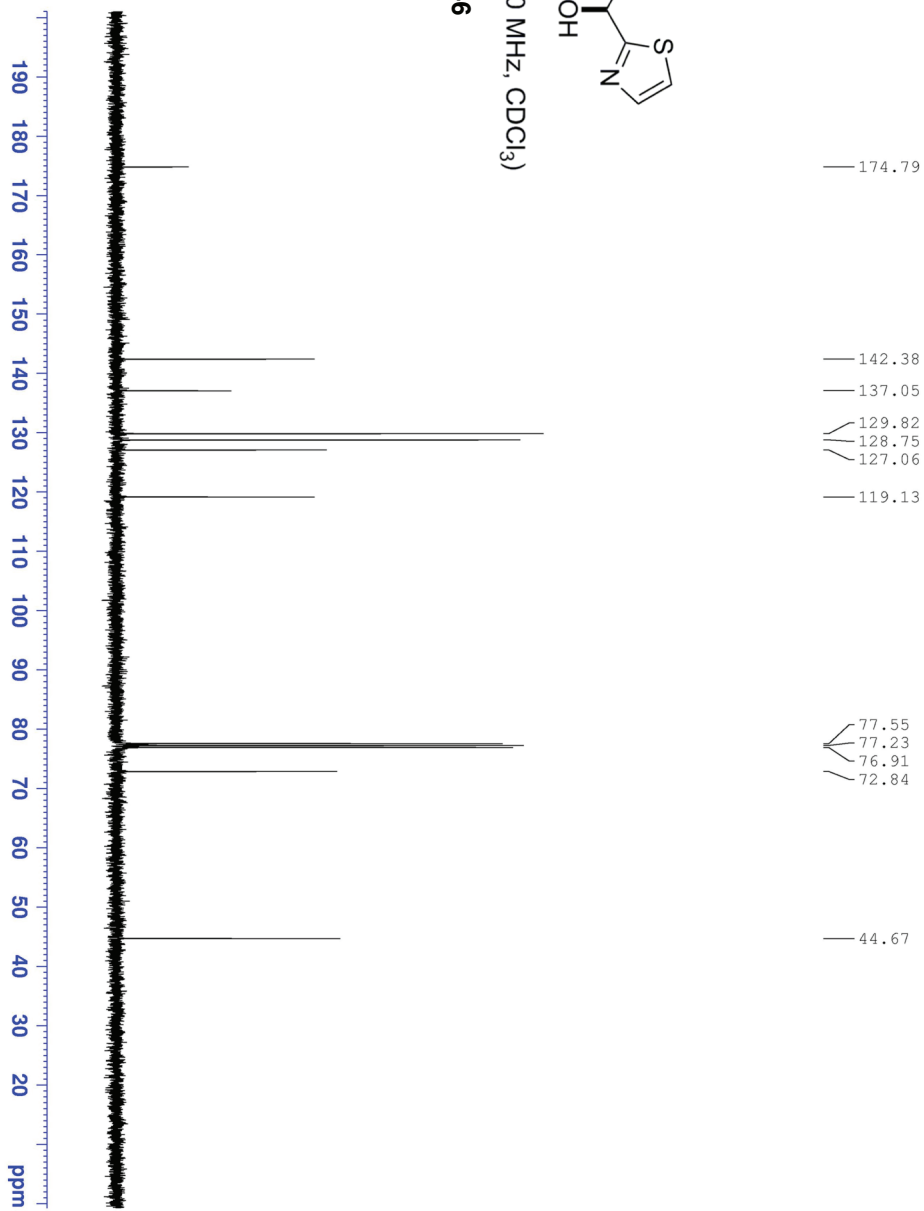



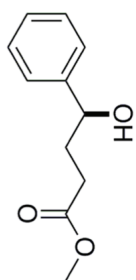

(<sup>1</sup>H NMR, 300 MHz, CDCl<sub>3</sub>)

(S)-10

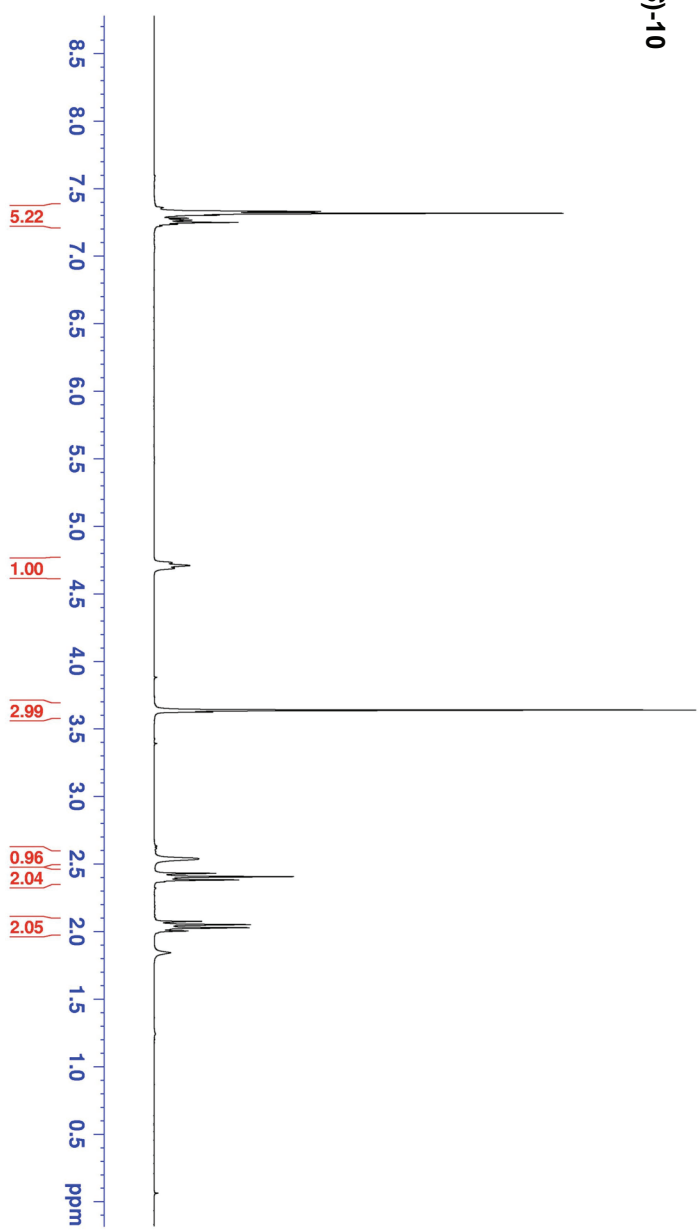

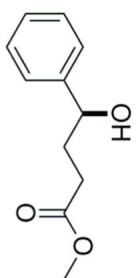

(<sup>13</sup>C NMR, 100 MHz, CDCl<sub>3</sub>)

(S)-10

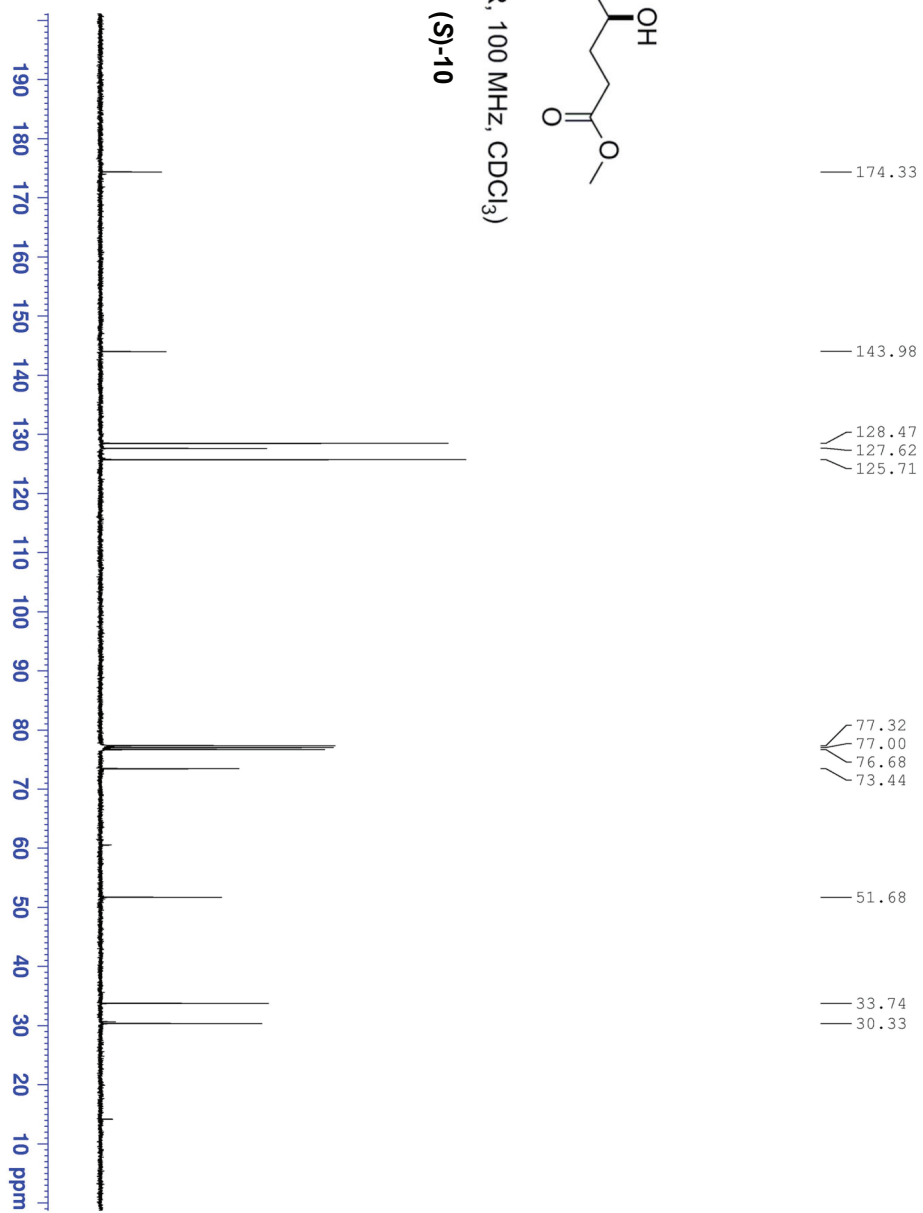

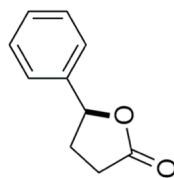

(<sup>1</sup>H NMR, 400 MHz, CDCl<sub>3</sub>)

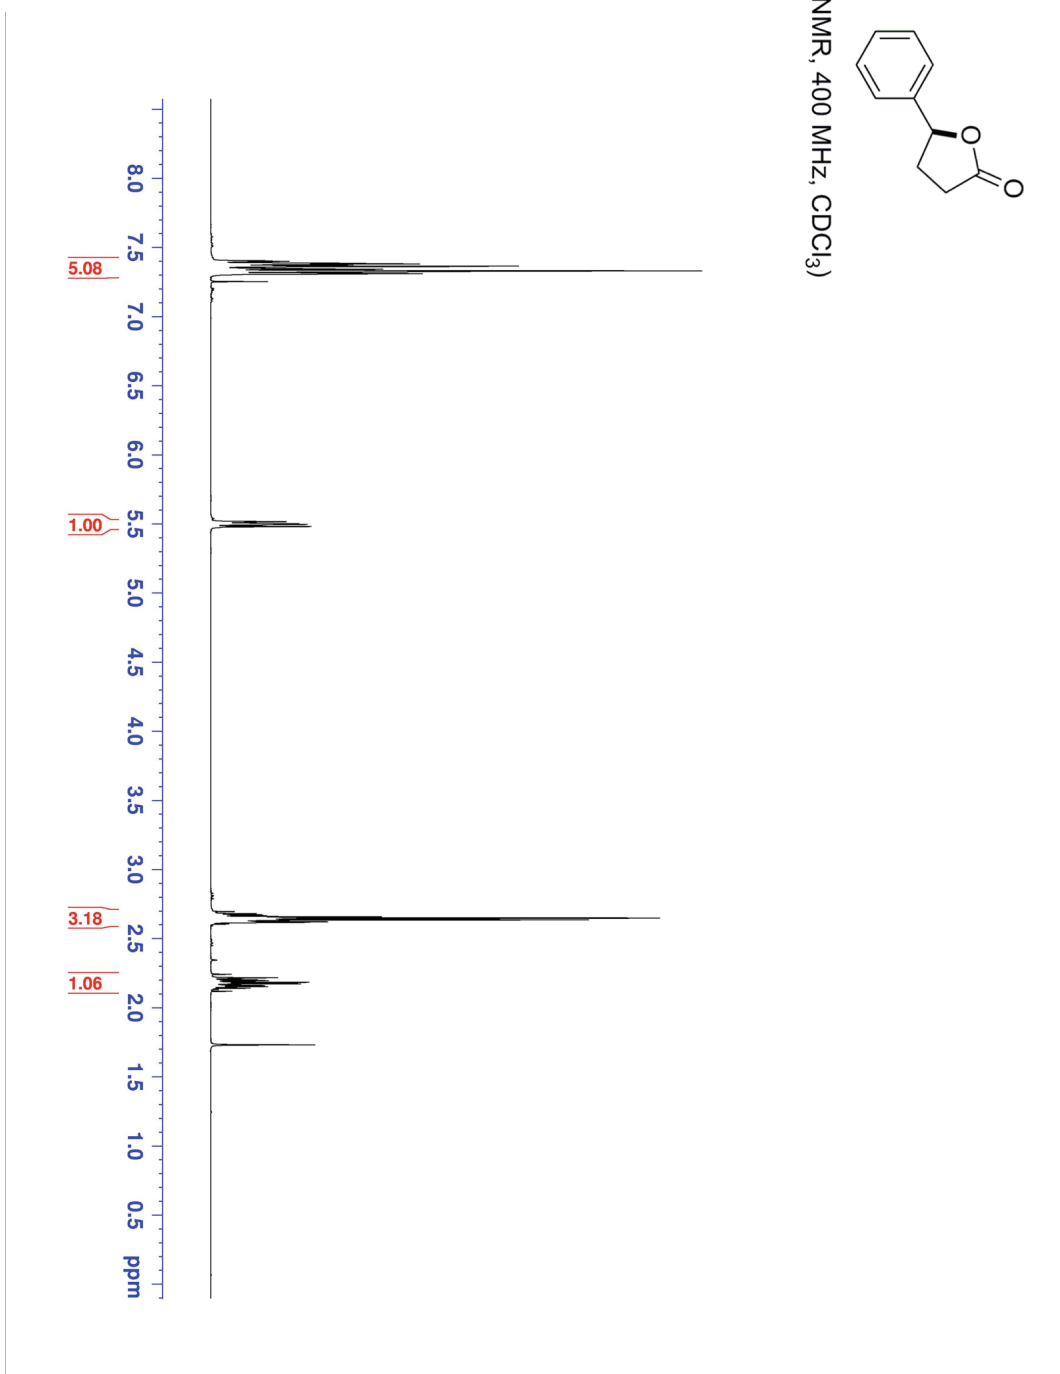

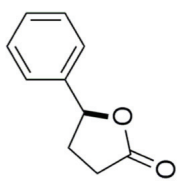

(<sup>13</sup>C NMR, 100 MHz, CDCl<sub>3</sub>)

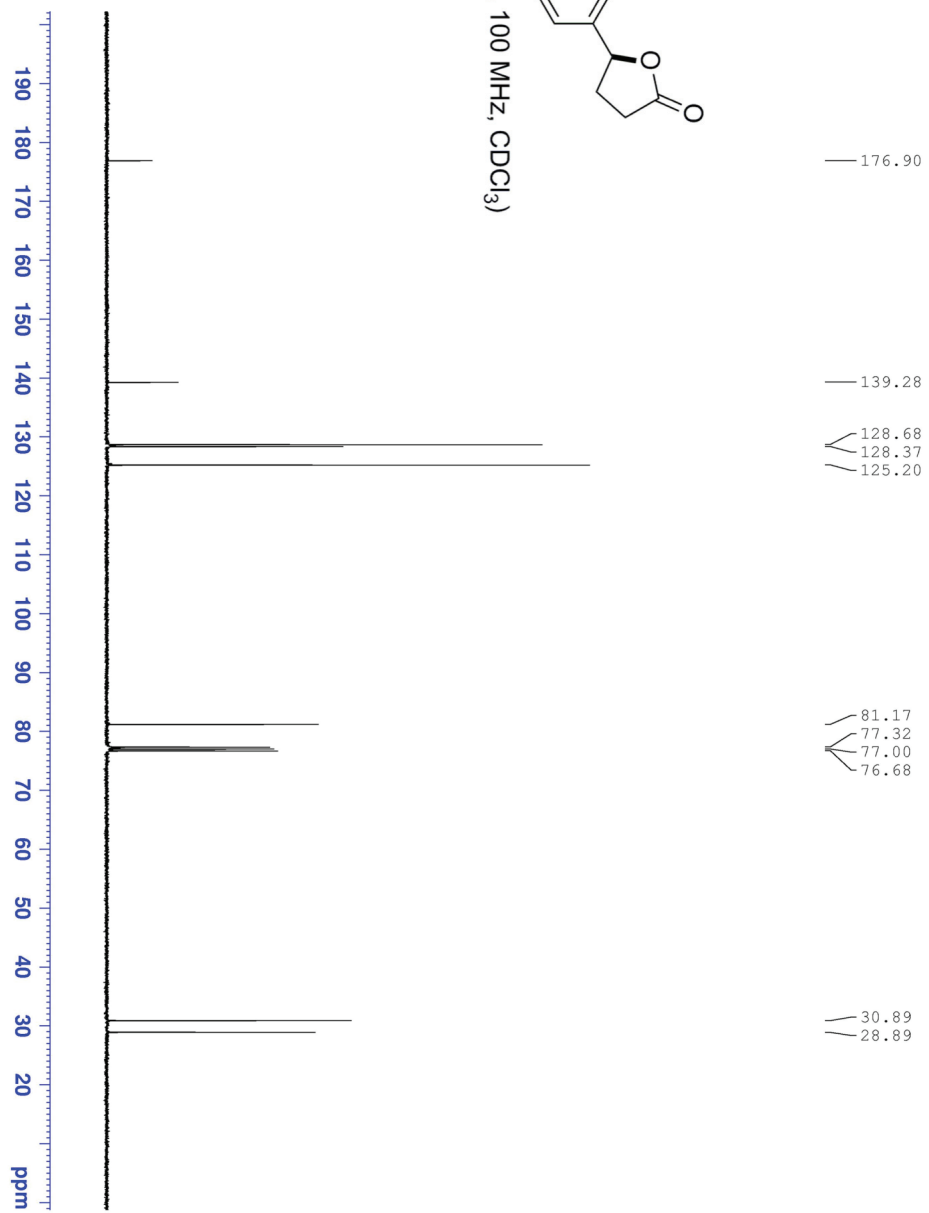

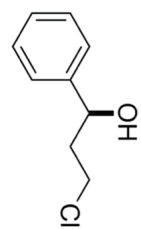

(<sup>1</sup>H NMR, 300 MHz, CDCl<sub>3</sub>)

(S)-12

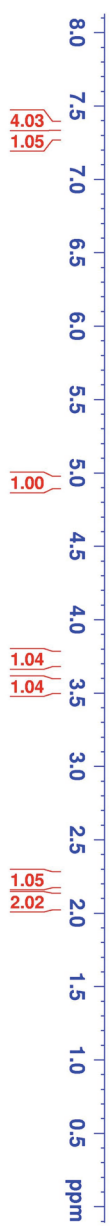

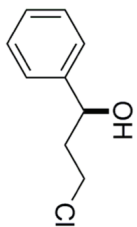

(<sup>13</sup>C NMR, 100 MHz, CDCl<sub>3</sub>)

(S)-12

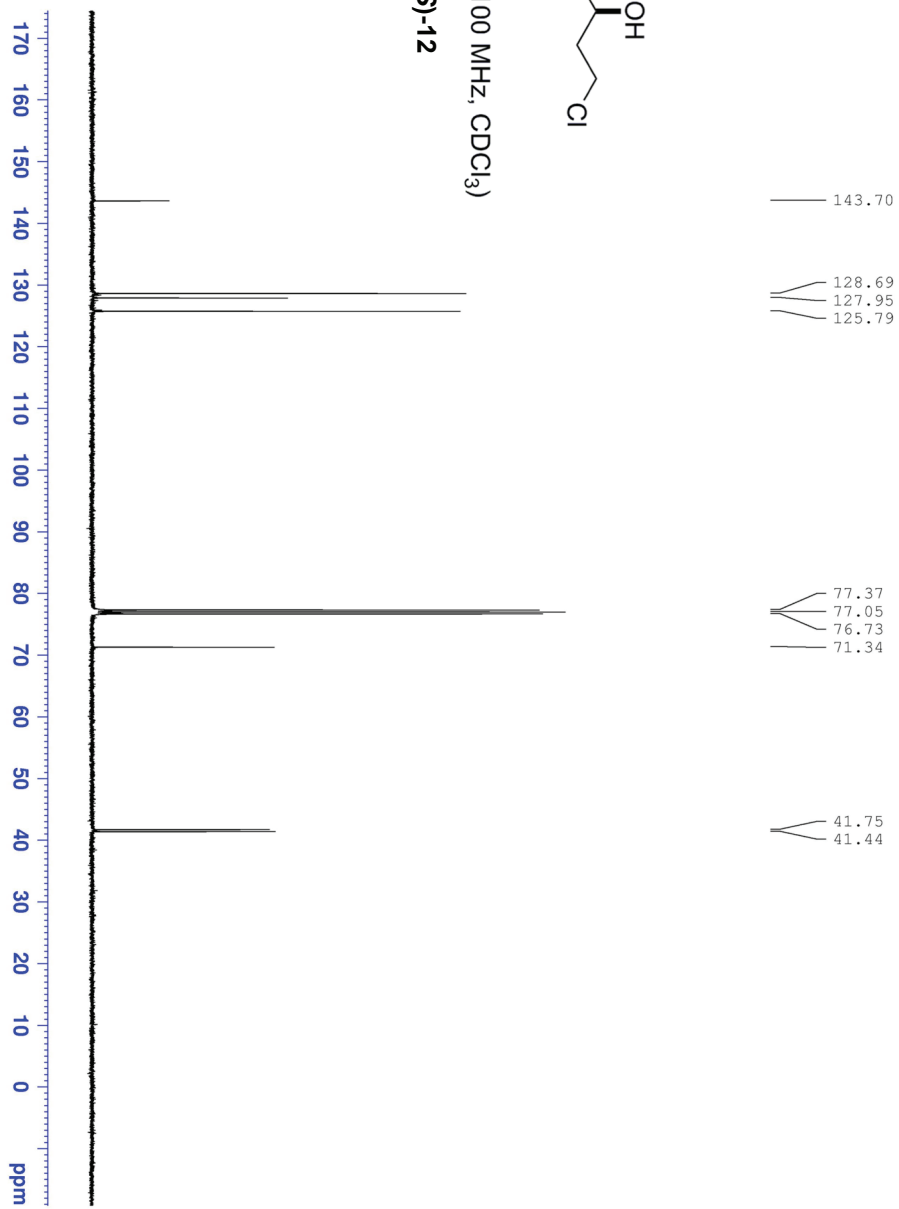

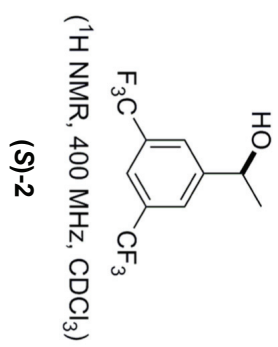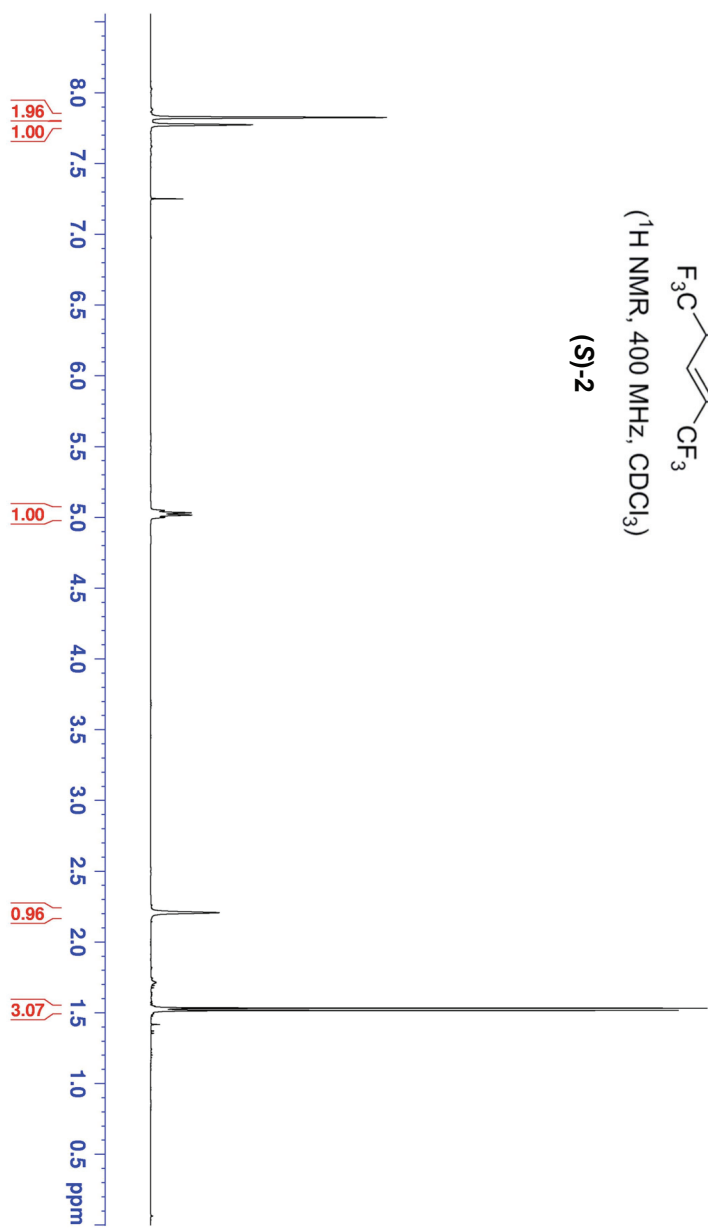

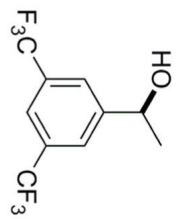

(<sup>13</sup>C NMR, 100 MHz, CDCl<sub>3</sub>)

(S)-2

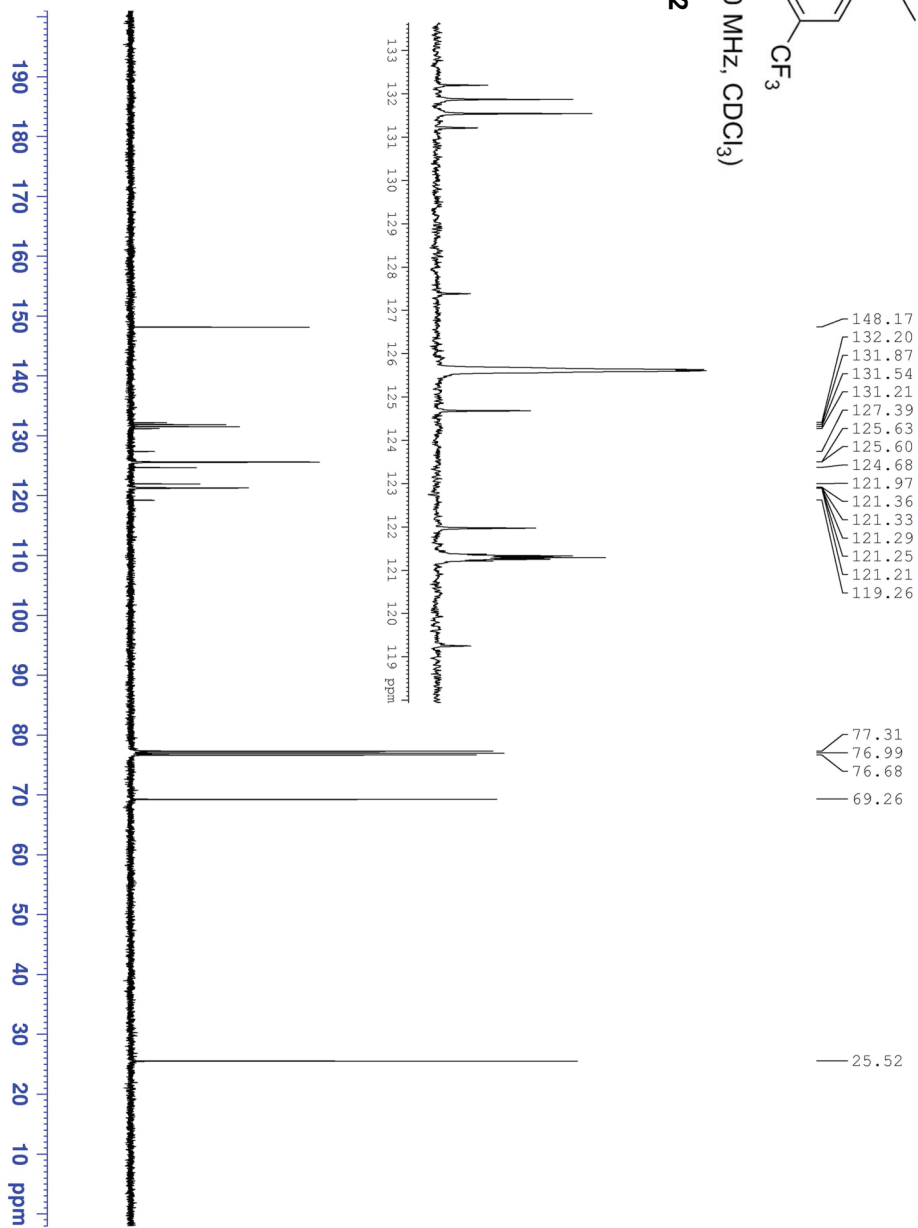



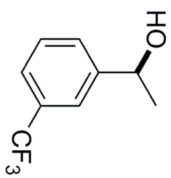

<sup>1</sup>H NMR, 400 MHz, CDCl<sub>3</sub>)

(S)-8

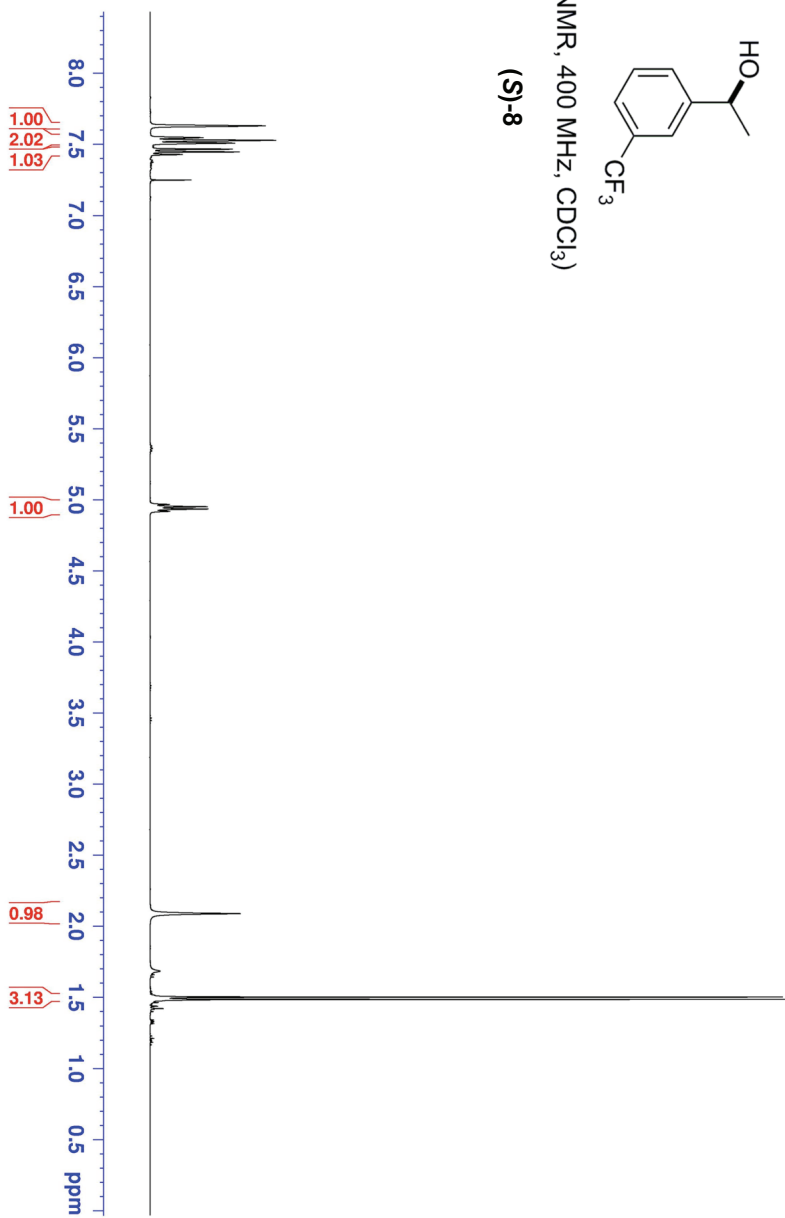

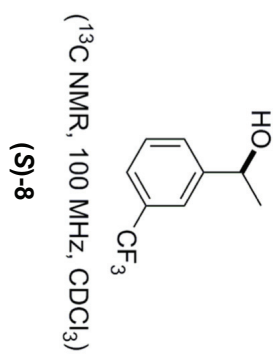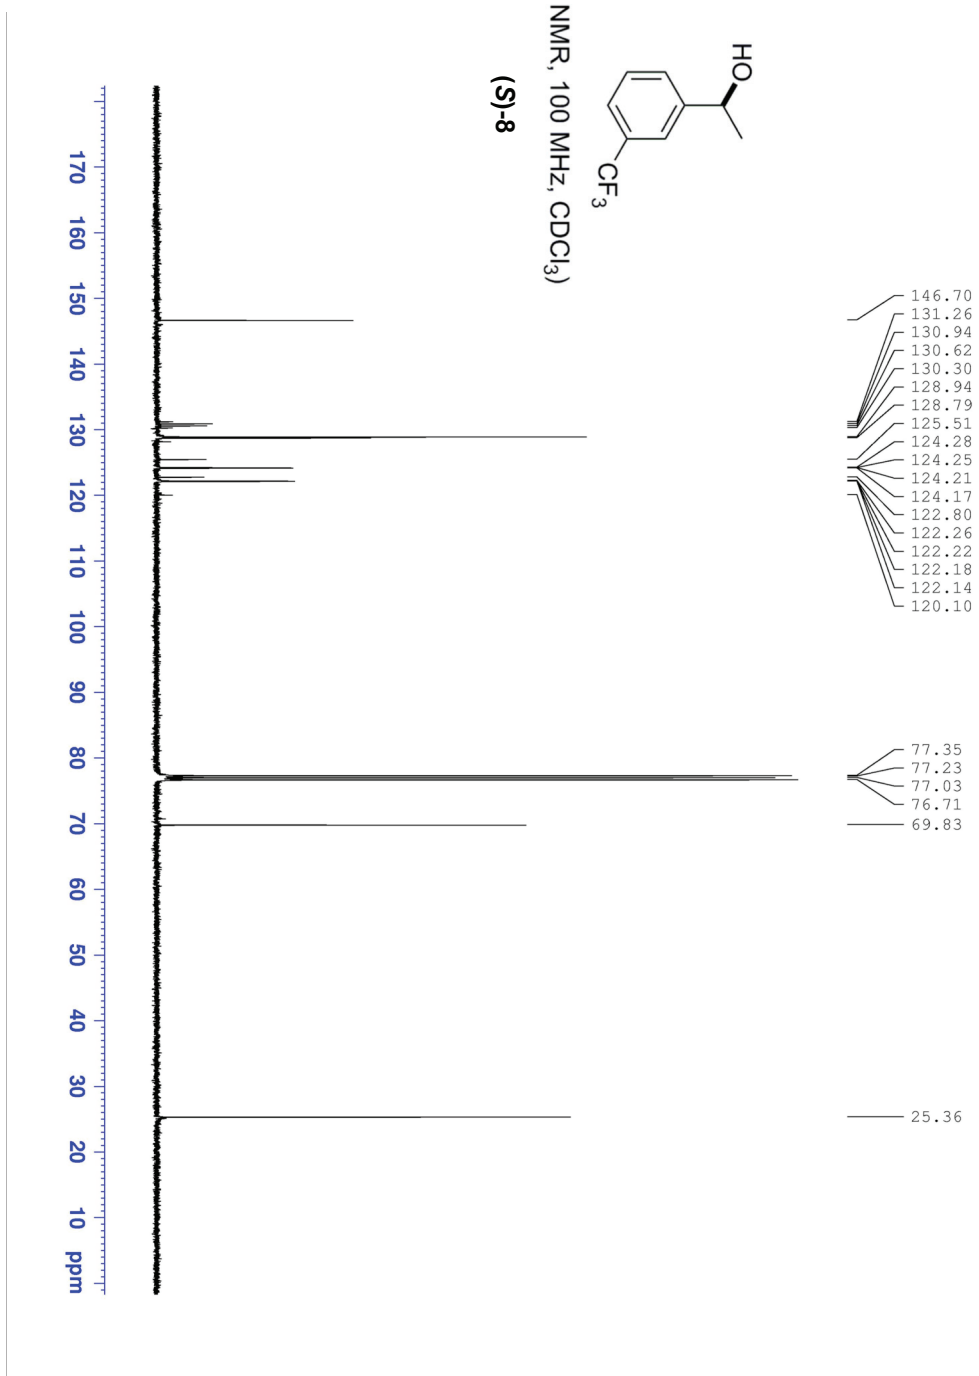

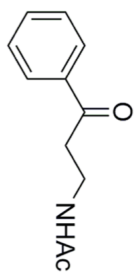

(<sup>1</sup>H NMR, 400 MHz, CDCl<sub>3</sub>)

13

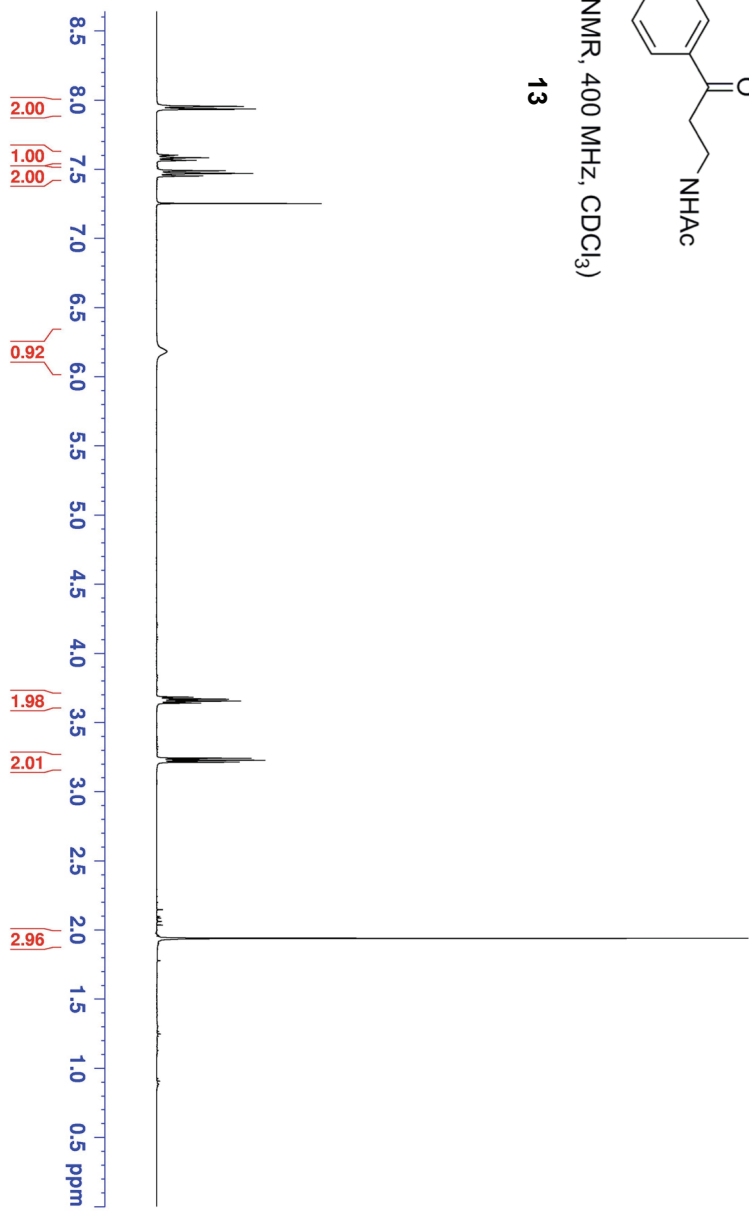

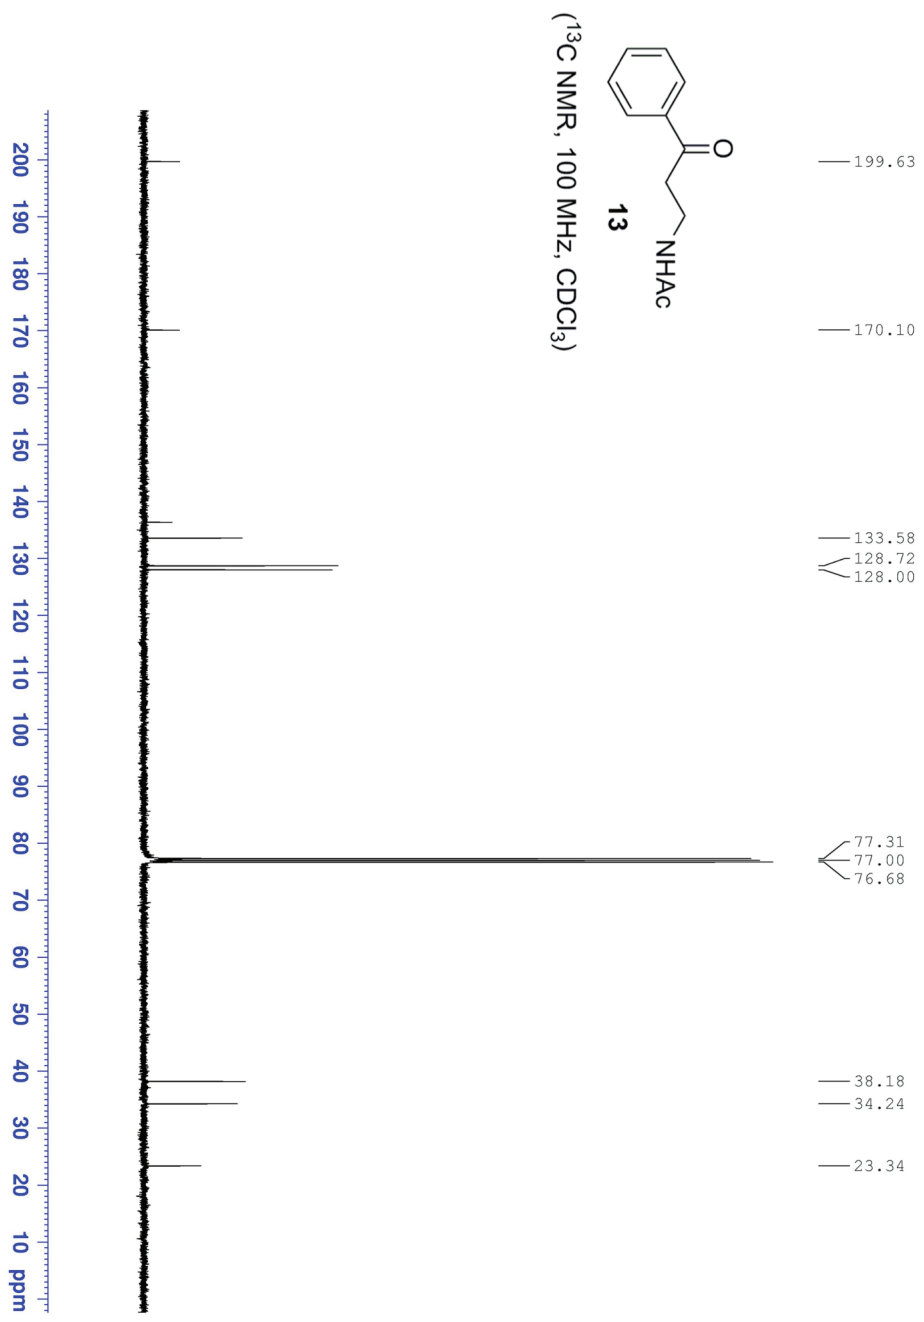

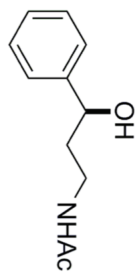

(<sup>1</sup>H NMR, 400 MHz, CDCl<sub>3</sub>)

(S)-14

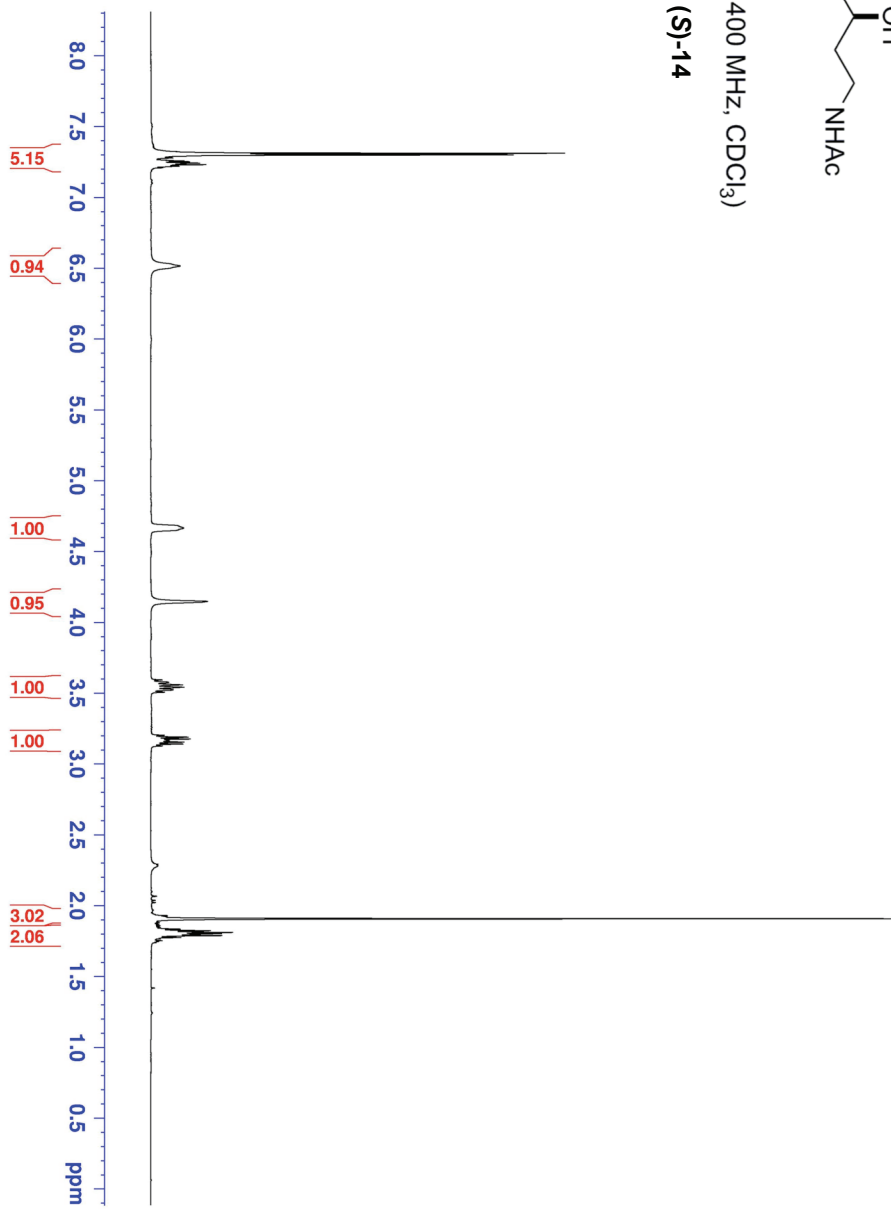

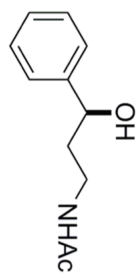

(<sup>1</sup>H NMR, 100 MHz, CDCl<sub>3</sub>)  
(S)-14

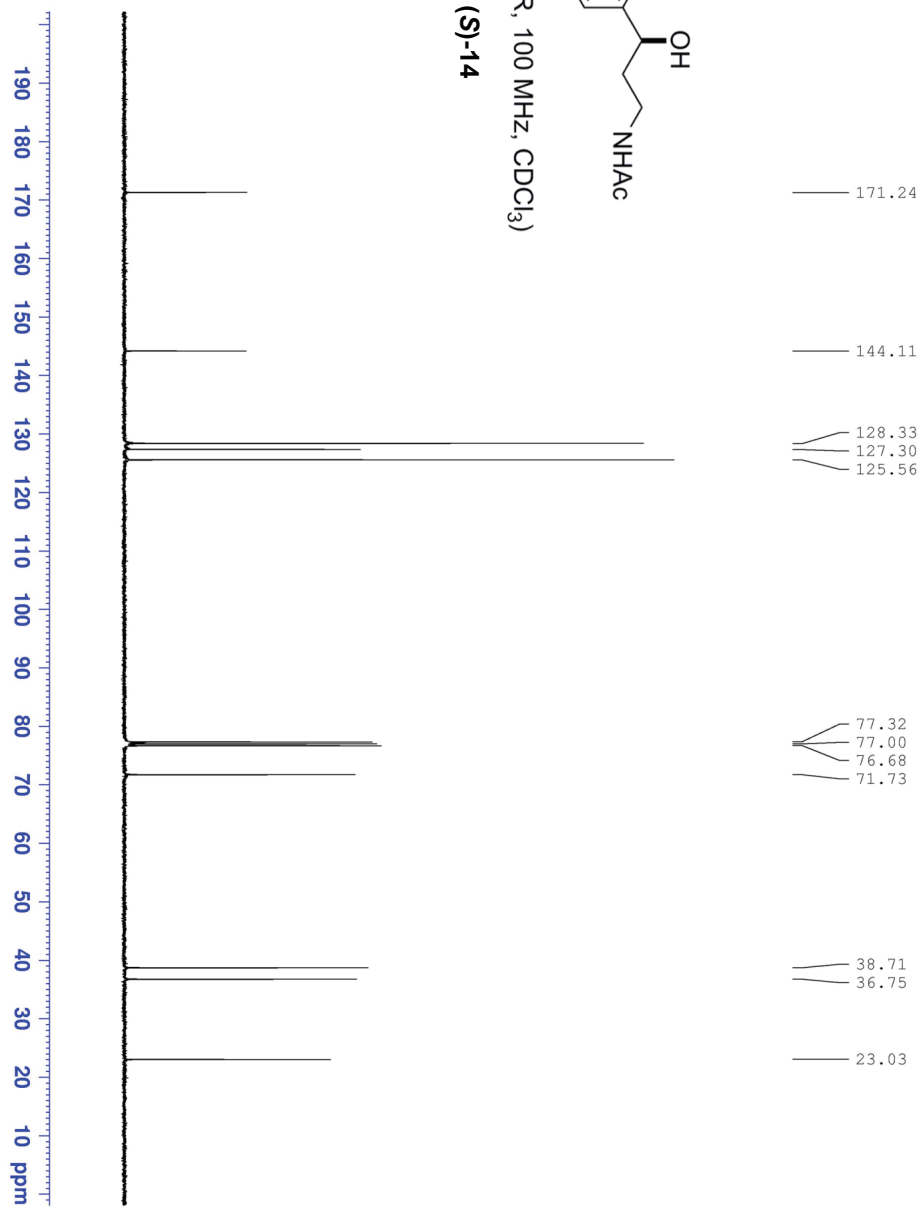

Supplement: NIHMS974791-supplement-01.pdf [file NIHMS974791-supplement-01.pdf]
